# Supplementary material for: Patient experiences of an ankle fracture and the most important factors in their recovery: a qualitative interview study
Source: PubMed Central journal article supplement (PMC7044932; doi:10.1136/bmjopen-2019-033539), 2020-02-04
Supplement: bmjopen-2019-033539.draft_revisions.pdf [file bmjopen-2019-033539.draft_revisions.pdf]

# BMJ Open

BMJ Open is committed to open peer review. As part of this commitment we make the peer review history of every article we publish publicly available.

When an article is published we post the peer reviewers' comments and the authors' responses online. We also post the versions of the paper that were used during peer review. These are the versions that the peer review comments apply to.

The versions of the paper that follow are the versions that were submitted during the peer review process. They are not the versions of record or the final published versions. They should not be cited or distributed as the published version of this manuscript.

BMJ Open is an open access journal and the full, final, typeset and author-corrected version of record of the manuscript is available on our site with no access controls, subscription charges or pay-per-view fees (<http://bmjopen.bmj.com>).

If you have any questions on BMJ Open's open peer review process please email [info.bmjopen@bmj.com](mailto:info.bmjopen@bmj.com)

# BMJ Open

## What are the patient experiences of an ankle fracture and the factors of most importance in their recovery? A qualitative interview study.

|                               |                                                                                                                                                                                                                                                                                                 |
|-------------------------------|-------------------------------------------------------------------------------------------------------------------------------------------------------------------------------------------------------------------------------------------------------------------------------------------------|
| Journal:                      | <i>BMJ Open</i>                                                                                                                                                                                                                                                                                 |
| Manuscript ID                 | bmjopen-2019-033539                                                                                                                                                                                                                                                                             |
| Article Type:                 | Original research                                                                                                                                                                                                                                                                               |
| Date Submitted by the Author: | 09-Aug-2019                                                                                                                                                                                                                                                                                     |
| Complete List of Authors:     | McKeown, Rebecca; University of Warwick Warwick Medical School, Kearney, Rebecca; University of Warwick, Warwick Clinical Trials Unit Liew, Zi Heng; University of Warwick, Warwick Clinical Trials Unit, Warwick Medical School<br>Ellard, David; University of Warwick, Clinical Trials Unit; |
| Keywords:                     | Foot & ankle < ORTHOPAEDIC & TRAUMA SURGERY, QUALITATIVE RESEARCH, Ankle fractures, ankle injury, interviews, quality of life                                                                                                                                                                   |
|                               |                                                                                                                                                                                                                                                                                                 |

SCHOLARONE™  
Manuscripts

1  
2  
3  
4  
5  
6  
7  
8  
9  
10  
11  
12  
13  
14  
15  
16  
17  
18  
19  
20  
21  
22  
23  
24  
25  
26  
27  
28  
29  
30  
31  
32  
33  
34  
35  
36  
37  
38  
39  
40  
41  
42  
43  
44  
45  
46  
47  
48  
49  
50  
51  
52  
53  
54  
55  
56  
57  
58  
59  
60

# What are the patient experiences of an ankle fracture and the factors of most importance in their recovery? A qualitative interview study.

## AUTHOR INFORMATION

Rebecca McKeown (Corresponding Author) Warwick Clinical Trials Unit, Warwick Medical School, University of Warwick, Clinical Sciences Research Laboratories, University Hospitals Coventry and Warwickshire, CV2 2DX, UK. [r.mckeown.1@warwick.ac.uk](mailto:r.mckeown.1@warwick.ac.uk) 07969116187 ORCID: <https://orcid.org/0000-0002-3502-2328>

Rebecca S. Kearney, Warwick Clinical Trials Unit, Warwick Medical School, University of Warwick, Clinical Sciences Research Laboratories, University Hospitals Coventry and Warwickshire, CV2 2DX, UK. [r.s.kearney@warwick.ac.uk](mailto:r.s.kearney@warwick.ac.uk)

Zi Heng Liew, Warwick Clinical Trials Unit, Warwick Medical School, University of Warwick, Clinical Sciences Research Laboratories, University Hospitals Coventry and Warwickshire, CV2 2DX, UK. [zi.liew@warwick.ac.uk](mailto:zi.liew@warwick.ac.uk)

David R. Ellard, Warwick Clinical Trials Unit, Warwick Medical School, University of Warwick, Clinical Sciences Research Laboratories, University Hospitals Coventry and Warwickshire, CV2 2DX, UK [d.r.ellard@warwick.ac.uk](mailto:d.r.ellard@warwick.ac.uk)

## WORD COUNT

5030 (excluding title page, abstract, references, figures and tables)

## ABSTRACT

### Objective

The objective of this qualitative research study is to explore the patient experiences of ankle fracture and the factors of most importance to them in recovery.

### Design

Semi-structured interviews exploring the patient experiences of ankle fracture recovery at 16-23 weeks following injury. Interviews followed a topic guide and were recorded with an encrypted audio recorder and then transcribed verbatim. Thematic content analysis was used to identify themes in the data.

### Setting

Individuals were recruited from a sample of participants of a clinical trial of interventions for ankle fracture. Interviews were conducted at the participants own homes or meeting rooms in a University campus setting.

### Participants

A purposive sample was used to account for key variables of age, gender and fracture management. Participants recruited from the clinical trial sample were adults aged 18 years or over with a closed ankle fracture.

### Results

Ten participants were interviewed, five of whom were female and six of whom had an operation to fix their ankle fracture. The age range of participants was 21-75 years with a mean of 51.6 years. Eight themes emerged from the data during analysis; mobility, loss of independence, healthcare, psychological effects, social and family life, ankle symptoms, sleep disturbance and fatigue and activities of daily living. Factors of importance to participants ranged from regaining independence, sleep quality, ability to walk without walking aids and radiological union.

## Conclusions

The results of this research demonstrates the broad reaching impact of ankle fracture on individuals' lives, including social considerations, sleep disturbance and psychological effects. Factors of most importance to individuals in recovery included mobility, being able to weight-bear, regaining independence, sleep quality, the ability to drive and radiological union.

## Keywords

Ankle fractures, ankle injury, interviews, qualitative research, quality of life, patient centred care.

## STRENGTHS AND LIMITATIONS OF THIS STUDY

- Use of well recognised reporting standards to ensure transparency.
- Duplicate data analysis to ensure consistency.
- Use of a purposive sample to account for key demographic variables.
- Use of participants from a clinical trial which restricted the timing of the data collection.

## BACKGROUND

Ankle fractures are significant injuries which cause pain and reduced mobility (1). Ankle fractures demonstrate a bimodal distribution, usually affecting younger males and older females, indicative of being a fragility fracture (2, 3). The incidence of ankle fracture is increasing and the contribute to the rising economic cost of managing fragility fractures in the current ageing population (4). This cost of managing fragility fractures in the UK is expected to reach £2.2 billion per annum by the year 2020 (5).

Whilst several clinical effectiveness trials have been recently published to ascertain the optimal management strategies for individuals with fractures of the lower limbs (6-8), there is comparably less research regarding the patient experiences of recovering from these injuries. In 2018 a James Lind Alliance priority setting partnership on the subject of lower limb fragility fractures was completed (9) and the sixth priority listed in this research area was "what is most important to adults in their recovery from a fragility fracture of the lower limb?". This highlights the demand not only from academics and clinicians, but also patients and members of the public for further research in this area. The life impact of ankle fractures has been previously assessed in an article including interviews of patients and clinicians in the context of outcome measure development (10). Here we

1  
2  
3 focus on patients only, with the aim of understanding their experience of ankle fracture recovery as  
4 well as the factors of most importance to them.  
5  
6

## 7 **Objectives**

8  
9  
10 The objective of this qualitative study is to explore the patient experiences of ankle fracture recovery  
11 and the factors of most importance to them during recovery.  
12  
13

## 14 **METHODS**

15  
16  
17 This research was conducted in accordance with the standards for reporting qualitative research  
18 (SRQR) checklist (supplementary file 1).  
19  
20

### 21 **Ethical Approval**

22  
23  
24 Ethical approval was gained through substantial amendment to the Ankle Injury Rehabilitation (AIR)  
25 Protocol (ISRCTN15537280) from the West Midlands Edgbaston NHS Research Ethics Committee on  
26 07/09/2018 (reference: 17/WM/0239).  
27  
28  
29

### 30 **Study Design and Methodological Approach**

31  
32  
33 We completed semi-structured interviews with individuals who had sustained an ankle fracture at a  
34 single time point between 19 and 23 weeks following injury. The qualitative approach used here was  
35 the thematic content analysis to focus on the participants' experience of their injury (11). We took a  
36 realist approach to the analysis, acknowledging that the individuals' ankle injuries exist in a reality  
37 outside of their own perception of it (12).  
38  
39  
40  
41  
42

### 43 **Participant Identification**

44  
45  
46 This study was embedded in an ongoing randomised controlled trial comparing plaster cast to  
47 functional brace in the treatment of individuals with an ankle fracture (ISRCTN15537280) (13).  
48 Participants of the trial were adults aged 18 years or over who had a closed ankle fracture either  
49 managed operatively or non-operatively.  
50  
51  
52

### 53 **Sampling**

54  
55  
56 We used purposive sampling for this research study. Participants who had previously stated that  
57 they were willing to be contacted for further research into ankle fractures were considered for  
58 invitation to the study. Participants were only approached after completion of the 16 week time  
59  
60

1  
2  
3 point in the trial follow up schedule as this was the primary outcome point for the trial. Interviews  
4 were completed after this time point so that the interview did not influence the way in which  
5 participants answered the trial questionnaire. The sampling strategy allowed for a diverse range of  
6  
7 patients with regards to their age, fracture management (operative or non-operative), gender and  
8  
9 allocated intervention within the trial (functional brace or plaster cast).  
10  
11

## 12 **Recruitment and Consent**

13  
14  
15 The participants of the trial were screened for sampling attributes of age, gender, fracture  
16 management and randomised intervention. Invitation letters and participant information sheets  
17 were sent out to those meeting the sampling requirements and in the letter stated that we would  
18 telephone them in one weeks' time to discuss the study. During the phone call, participants were  
19 given the opportunity to ask any questions. If they verbally consented to participate, a mutually  
20 convenient interview date and time was arranged between the interviewer and participant. At the  
21 interview consultation, the participant was given a further opportunity to ask questions. Once these  
22 had been answered satisfactorily they signed a consent form to confirm their willingness to  
23 participate. Participants were informed that they had the opportunity to withdraw their data at any  
24 time throughout the interview or up to 72 hours following the interview.  
25  
26  
27  
28  
29  
30  
31  
32

## 33 **Data Collection Process**

34  
35  
36 The interviews were completed by the lead author (RM), a female physiotherapist currently an  
37 academic researcher and working towards completion of a PhD. The interviewer had no previous  
38 relationship with the participants and did not inform the participants of her background as a  
39 physiotherapist to avoid this influencing participant responses. Interviews were completed at a  
40 mutually agreeable time in the participants own homes or in University meeting rooms where this  
41 was not possible. A topic guide was produced and followed throughout each interview to ensure  
42 consistency between interviews. Examples of the questions asked can be found in Table 1. Field  
43 notes were taken throughout the data collection and analysis to maintain reflexivity during the  
44 project. Interviews were completed from 12/10/2018 to 03/04/2019 and continued until data  
45 saturation was reached and no new themes emerged from the data.  
46  
47  
48  
49  
50  
51  
52

| 53 Example questions used in interviews                                         |
|---------------------------------------------------------------------------------|
| 54 Could you explain how your ankle fracture has impacted your day to day life? |
| 55 How has your ankle fracture affected your walking?                           |

56  
57  
58  
59  
60

|    |                                                                                 |
|----|---------------------------------------------------------------------------------|
| 1  | Could you talk to me about the impact of your ankle fracture on your family     |
| 2  | life?                                                                           |
| 3  | Could you explain what was most important to you when recovering from           |
| 4  | your ankle fracture?                                                            |
| 5  | What bothered you most throughout your recovery from your injury?               |
| 6  | You mentioned that...was an important factor to you. Could you tell me more     |
| 7  | about that?                                                                     |
| 8  | Did your ankle fracture affect your mood in any way?                            |
| 9  | How did your ankle fracture affect your work?                                   |
| 10 | How did your ankle fracture affect your leisure activities or use of free time? |
| 11 |                                                                                 |
| 12 |                                                                                 |
| 13 |                                                                                 |
| 14 |                                                                                 |
| 15 |                                                                                 |
| 16 |                                                                                 |
| 17 |                                                                                 |
| 18 |                                                                                 |
| 19 |                                                                                 |
| 20 |                                                                                 |

Table 1: Example questions used during the interviews

## Data Analysis

Interviews were recorded with the use of an encrypted digital audio-recorder for which the lead researcher only had access to. Interview recordings were then downloaded to a secure server and were password protected only accessible to the lead researcher. The interviews were transcribed verbatim and all identifiable information were removed to protect participant confidentiality. Interviews transcripts were stored on a secure server and pseudonymised by a unique study ID number. Once transcribed, interviews were uploaded to NVivo (NVivo12, QSR International) for analysis. We used thematic analysis to analyse the data. A second researcher (ZHL) duplicated the coding process in a sample of four of the interviews to ensure dependability and consistency in the analysis process (14).

## Patient and Public Involvement

Patient and public involvement representatives who were involved in the design and conduct of the randomised controlled trial (Karen Kates and Richard Grant) from Warwick University/User Teaching and Research Partnership (Warwick UNTRAP) provided consultation during protocol development, taking an active role in reviewing and commenting on the study processes and associated burden of the study on participants, particularly with the screening and identification process used. They provided consultation on the patient facing materials used in this study, including the patient information sheet, invite letter and topic guide to ensure suitability. Karen and Richard will be collaboratively involved in planning the dissemination of results to participants alongside the results of the trial when available.



## RESULTS

Ten participants were recruited and interviewed as part of this study. The age range was 21-75 years with a mean of 51.6 years. Data saturation was reached after eight interviews. Participant demographics and injury information can be found in Table 2.

For peer review only

| Participant ID | Time since injury   | Participant age (years) | Gender (M/F) | Fracture Management (Operative or non-operative) | Allocated Interventions | Any other injuries         | Mechanism of Injury                  | Occupation                      |
|----------------|---------------------|-------------------------|--------------|--------------------------------------------------|-------------------------|----------------------------|--------------------------------------|---------------------------------|
| 01             | 22 weeks            | 48                      | F            | Operative                                        | Functional Brace        | None                       | Low energy fall                      | Teacher                         |
| 02             | 22 weeks<br>6 days  | 59                      | M            | Operative                                        | Plaster Cast            | None                       | Low energy fall                      | Maintenance worker              |
| 03             | 21 weeks            | 75                      | F            | Non-operative                                    | Plaster Cast            | None                       | Low energy fall                      | Retired, volunteers for charity |
| 04             | 19 weeks,<br>1 day  | 37                      | M            | Non-operative                                    | Plaster Cast            | None                       | Low energy fall                      | University lecturer             |
| 05             | 21 weeks            | 29                      | F            | Operative                                        | Plaster Cast            | Contralateral ankle sprain | High energy fall doing gymnastics    | Nurse                           |
| 06             | 20 weeks,<br>4 days | 60                      | M            | Non-operative                                    | Functional Brace        | None                       | High energy fall whilst wakeboarding | Retired                         |

|    |                     |    |   |               |                     |                                      |                                                   |                               |
|----|---------------------|----|---|---------------|---------------------|--------------------------------------|---------------------------------------------------|-------------------------------|
| 07 | 21 weeks,<br>6 days | 73 | F | Operative     | Plaster Cast        | Ipsilateral<br>calcaneal<br>fracture | High energy<br>fall from loft<br>ladder           | Part time job<br>in a shop    |
| 08 | 21 weeks,<br>4 days | 45 | M | Non-operative | Functional<br>Brace | Contralateral<br>ankle sprain        | On a push<br>bike which<br>collided with<br>lorry | Works for car<br>manufacturer |
| 09 | 22 weeks,<br>3 days | 69 | F | Operative     | Functional<br>Brace | Wrist<br>fracture                    | Low energy<br>fall                                | Retired                       |
| 10 | 20 weeks,<br>2 days | 21 | M | Operative     | Functional<br>Brace | None                                 | High energy<br>fall from<br>moving<br>vehicle     | Undergraduate<br>Student      |

Table 2: Participant demographics and injury information.

1  
2  
3 During analysis, eight themes emerged from the data; mobility, loss of independence, healthcare,  
4 ankle symptoms, sleep disturbance and fatigue, family and social life, psychological effects, and  
5 activities of daily living.  
6  
7

## 8 9 **Mobility**

10  
11  
12 Participants described their difficulty in walking “normally” and getting around, usually describing  
13 this as frustrating or inconvenient. Many spoke about their reduced mobility in the context of their  
14 weight-bearing restrictions and walking aids, which were often discussed inextricably. The  
15 frustration caused by walking aids and weight-bearing restrictions were especially evident in the  
16 older participants of the study, many of whom described this as the most difficult part of their  
17 fracture for them. Others described walking with aids as slow and hard-work, requiring frequent  
18 rests and some noted their frustration with their inability to carry things. People also spoke of their  
19 walking aids as a necessary inconvenience, acknowledging that they were needed during periods of  
20 weight-bearing restrictions. Older participants discussed a fear of falling, usually when leaving the  
21 house. Some described the difficulty in not being able to drive, explaining how that was the most  
22 important factor in their recovery for them.  
23  
24  
25  
26  
27  
28  
29

30  
31 Pt09: *“Just stuck here...I felt like a prisoner in my own home I think for the first four weeks...”*

32  
33 Pt07: *“I used to dream of walking [the dog] down the park. Yeah...I would be...you know...dream*  
34 *about it. Erm [pause] just...just to be on two feet that was my sort of you know [pleading] ‘please let*  
35 *me get onto two feet”*  
36  
37

38  
39 Pt03: *“Yes because you know I thought crutches were easy things to use. But as I say to have to hop*  
40 *at my age is a very hard thing to do...”*  
41  
42

43 Pt10: *“You couldn’t go more than a hundred...two hundred metres without stopping because it just*  
44 *puts so much pressure on your hands.”*  
45  
46

47 Pt04: *“I wasn’t used to the fact that I couldn’t carry anything”*  
48  
49

## 50 **Loss of Independence**

51  
52 A loss of independence and subsequent reliance on others was spoken about by all participants,  
53 which was required for household tasks, care of dependents or transport. For some this was a  
54 source of frustration, especially evident in the older participants in this study sample. For others, the  
55 need to rely on others was less bothersome. Some individuals identified this as a cause of low mood  
56 and described how the ability to regain independence was of vital importance for their mental  
57  
58  
59  
60

1  
2  
3 wellbeing. The need to rely on others also was also discussed as causing tension with others in the  
4 household. Despite needing to rely on others for some things, people also described adapting the  
5 way they did things in order to retain their independence as much as possible.  
6  
7

8  
9 Pt01: *"I think that's the thing that got me down the most having to rely on others to come and take*  
10 *you out and you know which...which people were absolutely brilliant but I'm quite independent*  
11 *and...and I...that was hard"*  
12

13  
14 Pt09: *"...for mental reasons it's good to get back to normal erm that was quite important for me to*  
15 *feel as though I was able to take charge of my own life again. Erm yeah rather than relying on other*  
16 *people."*  
17  
18

19  
20 Pt10: *"I dunno you just get a bit claustrophobic everyone doing everything for you."*  
21

22  
23 Pt05: *"The worst part was not being able to do things when I wanted how I wanted that was the*  
24 *worst definitely."*  
25

26  
27 Pt05: *"He was having to do everything and I would sit and stare at the washing up and I couldn't do it*  
28 *and it was so frustrating because I like a clean house."*  
29

### 30 31 **Ankle Symptoms**

32  
33 Individuals spoke of troublesome symptoms around their ankle to varying degrees, including pain,  
34 skin changes, wound issues, swelling, reduced movement and loss of strength and muscle bulk.  
35 Whilst many individuals felt it was important to not be in pain, many described their pain as  
36 manageable and controllable, which didn't prevent them from performing functionally. Skin changes  
37 including dry skin around the ankle were noted, particularly by those participants who received a  
38 plaster cast. One individual became very concerned with the development of pressure sore from the  
39 plaster cast which kept them awake at night. Several people discussed the swelling in their foot and  
40 ankle, often attributing this to a difficulty in finding suitable footwear. Several people described a  
41 heightened awareness of their ankle, especially when discussing being out and about walking on  
42 uneven surfaces or returning to physical activity.  
43  
44  
45  
46  
47  
48  
49

50  
51 Pt06: *"I still carried on. I mean really it was not...on a scale of one to ten...it was never more than a*  
52 *sort of four or a five to be honest."*  
53

54  
55 Pt01: *"...and like I say of an evening if I...to come in from work not feel that it's swollen and not feel*  
56 *that it's uncomfortable erm then I think that perhaps that would be a hundred percent recovery."*  
57  
58  
59  
60

1  
2  
3 Pt05: *“Err that...the first time I think I was really concerned about the heel I was convinced it was*  
4 *numb because the cast was too tight and the fact that I couldn’t look at it...I couldn’t get to it...I*  
5 *couldn’t see it. Errm I was convinced absolutely convinced that I was getting all sorts of you know*  
6 *pressure sores...blisters.”*  
7  
8  
9

10 Pt09: *“I’ve got very good flexibility in my ankle but not much strength. So that’s what I’m working*  
11 *on.”*  
12  
13  
14

## 15 **Sleep Disturbance and Fatigue**

16  
17 Participants described disturbed sleep and increased fatigue in their recovery period from the ankle  
18 fracture. Individuals described difficulty getting to sleep or waking during the night due to pain.  
19 Those who had a plaster cast described a difficulty in getting comfortable at night due to this. Some  
20 described a general increase in fatigue because of the increased effort that walking took. Many  
21 spoke about sleep in the context of their medication, with some individuals using pain medication to  
22 aid with sleep issues. Others described how the sleep issues and subsequent tiredness affected their  
23 performance at work. Some felt that the pain in the earlier stages of their ankle fracture recovery  
24 prevented sleep so much that this was one of the more importance factors in their ankle fracture  
25 recovery.  
26  
27  
28  
29  
30  
31  
32

33 Pt04: *“Erm I think the loss of sleep was the worst. Yeah...it wasn’t it wasn’t even so much the pain*  
34 *itself as the fact that I wasn’t sleeping properly and I was tired all the time for a few weeks I think*  
35 *that was the worst.”*  
36  
37  
38

39 Pt02: *“I think it stopped me from...yeah I think it stopped me from sleeping so much. I just couldn’t*  
40 *get it comfortable at all... it’s when it was in the cast was the main thing, getting it comfortable in*  
41 *the cast.”*  
42  
43  
44

## 45 **Psychological Effects**

46  
47 Psychological effects were discussed to varying degrees between participants in this study. Many  
48 described their difficulty moving around and need to rely on others as frustrating, which was a  
49 commonly described emotion by individuals. Some described feelings of depression and low mood  
50 attributed to their injury. One individual described an emotional lability during their recovery period,  
51 explaining how they would cry a lot more readily than usual throughout the recovery. Several people  
52 described an anxiety regarding the long term function of their ankle. Younger participants  
53 particularly described this anxiety when discussing valued activities such as sports and leisure. The  
54 older participants were more concerned with getting back to usual function in terms of walking and  
55  
56  
57  
58  
59  
60

1  
2  
3 driving, explaining their hopes of regaining their pre-fracture level of independence. There were  
4 some individuals who did not report any mood changes as a result of their fracture. Some individuals  
5 reported issues with body image and voiced concerns regarding their inability to exercise and the  
6 impact that might have on their weight. Some participants spoke of their injury and associated  
7 limitations in relation to feeling old or referencing the ageing process when discussing their fracture.  
8  
9

10  
11  
12 Pt09: *"Yeah. Tearful. Yeah. Not so much when I was out 'cos you don't do that. But yeah. It's just a*  
13 *horrible feeling...just...I don't...it's so difficult to be able to pin point exactly what it is that actually*  
14 *brings the tears on. I was low...very low."*  
15  
16

17  
18 Pt03: *"Yeah but it did make me depressed at times yeah."*  
19

20  
21 Pt05: *"Any anxieties I had at that time were around long term recovery. I mean I probably could have*  
22 *been happier but I wouldn't have gone so far as to say I was actually depressed."*  
23

24  
25 Pt08: *"I was anxious...Yeah but it's just it...well it's alright now but at the time I remember thinking...I*  
26 *was...I was quite frightened 'cos it was really painful."*  
27

28  
29 Pt05: *"Erm and that is so important to me to be able to get back to that...to be fit you know so I'm*  
30 *quite weight conscious. I'm very conscious of the fact that I don't want to get fat sitting around and*  
31 *not doing anything."*  
32

33  
34 Pt03: *"Errm one of these elderly people's push about things in the house [pause] and I just get it into*  
35 *my mind that I'm not old enough for one of them yet [laughs] so that was very disheartening yeah to*  
36 *use that."*  
37  
38

### 39 40 **Activities of Daily Living**

41

42  
43 Participants described their difficulty or inability to complete their activities of daily living, such as  
44 personal care, household tasks, work and leisure activities. When discussing personal care and  
45 washing and dressing, many people spoke of finding new routines and adapting to new ways of  
46 doing things. Some required assistance from others to wash and dress. Individuals discussed these in  
47 relation to their walking aids and weight bearing status, stating that these factors meant that the  
48 process of washing and dressing took much longer. Those who received the functional brace spoke  
49 of the benefit of removing the brace for washing. Those who received a plaster cast discussed the  
50 use of cast covers for washing and some females spoke of the frustration with not being able to  
51 shave their leg due to the cast.  
52  
53  
54  
55  
56  
57  
58  
59  
60

1  
2  
3 Pt09: "...fortunately they could take me to the toilet on a like a wheelie commode thing which sort of  
4 slots over the toilet so that wasn't too bad in that respect but it's still...[sighs] it's something we don't  
5 like I suppose isn't it? You know the personal things...going to the toilet...washing...somebody had to  
6 shower me but you know I...I was OK."

7  
8  
9  
10 Pt04: "Getting in the shower was a pain...I'm kind of hopping over a slippy floor in the shower erm  
11 with a weird pose to make sure I'm not putting too much weight on my leg. Erm so it took much  
12 longer to shower."

13  
14  
15 Pt05: "I wanted to shave my leg...I wanted to wash it properly...the first thing I did when I got home I  
16 took it off had a shower shaved my leg it was disgusting. My other half nearly divorced me over the  
17 state of my leg! [laughs]"

18  
19  
20  
21  
22 Household tasks were restricted by participant's injuries and many spoke of these in the context of  
23 their walking aids, as they did not have hands free to carry things. Many spoke of relying on others  
24 for completion of essential tasks such as meal preparation and grocery shopping. Some spoke of  
25 adaption in doing things such as housework by getting on their hands and knees to complete tasks as  
26 required. Many people however described how others took on the majority of the house work and  
27 caring for any dependents. Some people found a source of frustration in the standards of cleanliness  
28 of the other person completing the housework, which did not match their own personal standards.

29  
30  
31 Pt10: "I remember the most frustrating thing...it was just the little things just having a big bag of  
32 washing on the top floor and I couldn't put it on the handle of the crutch and peg it down so I had to  
33 call someone up and they had to come and cart it down for me."

34  
35  
36 Pt05: "Yeah well I was lucky my wife basically took over everything. We try and share most things  
37 and erm I was...I was totally just not contributing at all so I mean as typical evening routine now I  
38 would help get the kids to bed I would help bath them I'd help give them dinner and whilst she's  
39 getting the baby to sleep I'd do the washing up and hoover and erm pack the bags for tomorrow  
40 things like that so for a few weeks that almost went out the window."

41  
42  
43 Pt07: "Erm [pause] yes I discovered that if I got on my knees...hands and knees [pause] I could  
44 actually...not hoover...but I could get a stick brush and sweep the carpet. Erm I did that for quite a  
45 while. And then you had to make sure that you were near something so that I could get back up  
46 again. I also did gardening on my hands and knees because it was...to see it just going...it was heart-  
47 breaking. And I thought 'right if I could get out there I'm sure if I'd got something to kneel on I can  
48 actually do that' and I did."



1  
2  
3 In terms of leisure time, many people were restricted from participating in their usual leisure  
4 activities due to their injury and used this free time for more sedentary activities instead. For some  
5 this was acceptable but this was a source of frustration for others who explained a dislike for “sitting  
6 around”. Those who were normally physically active discussed their anxieties with returning to these  
7 activities and discussed a feelings of caution associated with their return to sports and exercise.  
8 Those with more sedentary hobbies reported little or no impact on these. Several people spoke of  
9 having to miss holidays due to their injury.

10  
11  
12 Pt06: “Errm errrm but apart from that it was obviously a massive limitation on doing all the sport I  
13 like to do. Errm so that was....it sort of drove me a bit mad.”

14  
15  
16 Pt09: “...you know when you’ve got the opportunity maybe to sit and watch television all day or read  
17 all day or whatever but you don’t...mentally you don’t feel like doing that either?”

18  
19  
20 Pt07: “I mean I do sewing...I make bags and that...well of course I just hadn’t got the strength in that  
21 foot to press the pedal down on the machine [pause] so I couldn’t do...yeah anything like that.”

## 22 23 24 25 26 27 28 **Family and Social Life**

29  
30  
31 Many individuals discussed the impact that their ankle fracture had on their usual social and family  
32 life. The majority of individuals described how their social life only changed in so much that people  
33 came to visit them or to take them out, rather than independently going out to meet others. Some  
34 described a reduction in alcohol consumption because of this and also due to the pain medication  
35 they were taking. Some described how their social life was better or that they saw family more as  
36 they were always checking in to help them. Some individuals described how their low mood meant  
37 they didn’t feel up to socialising as much as usual. In terms of family life, many of the participants  
38 spoke of needing to adapt usual roles and responsibilities in light of the injury. A few individuals  
39 mentioned the tensions this could sometimes cause in their relationships with others. The impact on  
40 the family and family activities were also discussed, such as adapting childcare responsibilities and  
41 activities done as a family. Several individuals took time to explain their concern with the strain and  
42 pressure this put on other members of the household or wider family, who were taking on more  
43 responsibility than usual. Those with childcare responsibilities spoke of the psychological impact of  
44 not being able to perform the role they would usually perform for their children.

45  
46  
47 Pt09: “I was totally reliant either on [husband] or on friends to pick me up...take me out erm but  
48 again you don’t feel like doing the things. Erm people would say ‘Ooh you know come and do this.’  
49 And you think ‘Oh I don’t want to be out in company’ but we did I mean we forced ourselves to. Erm  
50  
51  
52  
53  
54  
55  
56  
57  
58  
59  
60

1  
2  
3 *[pause] so yes it did impact on it but only probably because we allowed it to in the sense that we*  
4 *didn't want to go anywhere."*

5  
6  
7 Pt01: *"I suppose the most frustrating thing for me really was that erm [name of child] my eldest erm*  
8 *was doing his A-Levels and so erm I was unable to take him backwards and forwards because, he*  
9 *was...he was at [school name], I was unable to drive him to his exams so my dad he was brilliant he*  
10 *stepped in but...just little things like that it just makes you feel a little bit*  
11 *[pause]...you....psychologically you feel like you're not able to perform the role that you normally*  
12 *perform sort of thing so..."*

13  
14  
15 Pt 05: *"Having to spend so much time with my mum that we started to grate on each other's nerves*  
16 *after a while and in the end you just think 'I'd rather just stay indoors than have to go round and*  
17 *have another argument with mum because I've seen her every day for the last two weeks'."*

## 23 24 **Healthcare**

25  
26  
27 Individuals discussed their experiences of the healthcare they received for their ankle fracture.  
28 Many of the participants praised the services provided and staff providing them during their  
29 recovery period. Those who required an inpatient stay for their injury described these lonely or  
30 difficult due to other patients in the ward with them. Fracture clinic experiences were generally  
31 positive, with some individuals expressing confusion about seeing a different clinician to the one  
32 who performed their fracture fixation operation. Those who received physiotherapy generally  
33 recounted this as a useful experience, often describing it as solution focussed and helpful in  
34 providing education and reassurance about their injury. Others described physiotherapy as slow and  
35 hard work. Those who were not offered physiotherapy explained how they felt they would have  
36 benefitted from it. For one individual, when asked about the factors of most importance to them,  
37 they responded that the radiographic outcome was important and being able to see that the bone  
38 had healed on the radiographs was the most important factor to him in his recovery.

39  
40  
41 Pt02: *"Well when they took the cast off the only thing that did concern me; I didn't have the same*  
42 *surgeon looking at it. I was expecting the same one as he did it just to say it was ok but erm I thought*  
43 *that was pretty strange. Usually you get the same surgeon all the way through the same doctor all*  
44 *the way through."*

45  
46  
47 Pt01: *"She [physiotherapist] was absolutely brilliant really, really good and I think that just helped as*  
48 *well just having somebody you know showing you the things you could do but also say... you could*  
49 *just give you the confidence that yes you are fine to walk on it it's not going to [pause] do anything or*  
50 *whatever so that...I think...I think the physio is really important."*

1  
2  
3 Pt10: "No that's the only thing really they never offered me physio. Erm whether they felt I didn't  
4 need it or anything I'm not sure. Or whether that's something you have to pursue privately I don't  
5 know. But no they never really offered it or spoke about it. Erm but my Mum said 'you should  
6 probably get some' but I just never really followed it up."  
7  
8  
9

10 Pt08: "Oh seeing the radiographs 'cos I wanted to see the bone...solid again. That...that's what I  
11 wanted to see anyway. And every time I kept going back and just seeing the gap...'cos it wasn't  
12 pinned it was just and that goal...that was the target I wanted to see a radiograph that looked like it  
13 didn't have a split down the bone. But that was the initial thought it was like let's see the  
14 radiographs...when that crack's gone I'm...I'm well again"  
15  
16  
17  
18  
19

## 20 DISCUSSION

21  
22  
23 The results of this qualitative study shows that individuals experience a wide range of concerns  
24 related to their ankle fracture, including the usual presentations of pain, stiffness and reduced  
25 mobility. Individuals discussed a wide ranging impact of their injury on their lives, such as effects on  
26 psychological wellbeing and individuals' families and social lives. The concern of losing independence  
27 was most apparent in the older participants of this study. However, people also spoke of adapting in  
28 order to retain independence throughout the recovery. The factors of most importance discussed by  
29 the participants here ranged from regaining independence, ability to drive or get out and about, no  
30 longer requiring use of walking aids or needing to follow weight bearing restrictions. However, some  
31 were most concerned with the radiographic outcome during their recovery, describing a wish to see  
32 union of the fracture site on X-Ray.  
33  
34  
35  
36  
37  
38  
39

40  
41 The strengths of this study include the exploration of a burdensome condition which is increasing in  
42 prevalence. Exploring the factors of most importance to individuals with ankle fracture in such a  
43 widely studied injury is important in ensuring we are collecting relevant and important outcomes for  
44 individuals with this injury, providing care sensitive to the issues most pertinent to patients. We used  
45 a purposive sample to interview a representative sample of the population of adults with ankle  
46 fractures and duplicated the data analysis for purposes of consistency. A weakness of this study is  
47 that the timing of the interviews were limited by the primary outcome time point of the trial. If this  
48 was not a constraint, it would have been beneficial to interview and regular time periods from time  
49 of injury to ensure that participants could be interviewed throughout recovery period, rather than  
50 requiring the participants to recall information. Furthermore, the lead researcher (RM) and second  
51 coder (ZHL) are both physiotherapists by background. Whilst every effort was made to ensure  
52  
53  
54  
55  
56  
57  
58  
59  
60

1  
2  
3 researcher reflexivity throughout the process of the study, this will likely have influenced the  
4 interpretation of data.  
5

6  
7 This study compares to that completed by McPhail, Dunstan (10) who also demonstrated wide  
8 ranging effects on individuals with ankle fracture, including social and psychological impacts as well  
9 as activities of daily living. There were some differences of this study, in that here we focussed only  
10 on patients with an ankle fracture, whereas the previous research also interviewed clinicians. This  
11 article adds the concepts and factors of most importance to individuals' with an ankle fracture,  
12 contributing further to this research area. Other research into patient experience of hip fracture  
13 showed similar thematic results including mobility and psychological effects (15). Another article  
14 focussing on older women with vertebral fracture in Sweden also compares to results found here,  
15 showing the importance and strive for individuals to maintain independence when recovery from  
16 fracture (16).  
17  
18  
19  
20  
21  
22  
23

24 This study provides useful information on the experiences of those recovering from an ankle fracture  
25 and the factors of importance to them throughout their recovery. It is interesting to note that whilst  
26 the majority of individuals are concerned with functional restoration, such as regaining full mobility  
27 and movement, some are concerned with the clinical findings such as radiological union. Results  
28 presented here enable a greater understanding of the lived experiences of individuals with this  
29 injury to allow for clinicians to better plan and implement appropriate patient centred management  
30 strategies. The notable difficulty of managing weight bearing restrictions, particularly evident in the  
31 older individuals included in this study, demonstrates a need for further research into the most  
32 appropriate weight-bearing protocols for ankle fractures, which is currently unclear and clinical  
33 practice is inconsistent (17, 18). The results of this study will enable those involved in clinical  
34 research for interventions for ankle fracture to select the most appropriate patient centred outcome  
35 measures which measure items of most importance to patients.  
36  
37  
38  
39  
40  
41  
42  
43  
44  
45

## 46 **ACKNOWLEDGEMENTS**

47

48  
49 We would like to thank the participants of this study for giving up their time to speak to us about  
50 their experiences of their ankle fracture. We would also like to thank the AIR Trial Management  
51 Group, Karen Keates and Richard Grant and for their contribution to this study.  
52  
53  
54  
55  
56  
57  
58  
59  
60

## AUTHOR'S CONTRIBUTIONS

RM, RSK and DRE developed the protocol. RM completed the participant screening, recruitment, data collection and interview transcription. RM and ZHL completed the data analysis. RM, DRE, ZHL and RSK contributed to the final manuscript. All authors reviewed and approved the final manuscript.

## FUNDING

Rebecca McKeown is funded by a National Institute for Health Research (NIHR) Career Development Fellowship for this research project. This publication presents independent research. The view expressed are those of the authors and not necessarily those of the NHS, the NIHR or the Department of Health and Social Care.

## COMPETING INTERESTS

RM, DRE and ZHL confirm they have no conflicts of interest to declare. RSK is a NIHR Senior Fellow, current member of the UK NIHR HTA CET board and NIHR ICA Doctoral panel and former member of the NIHR RfPB board.

## SRQR CHECKLIST

The SRQR Checklist is included as supplementary file 1.

## DATA SHARING STATEMENT

No additional data are available.

## REFERENCES

1. Pasco JA, Sanders KM, Hoekstra FM, Henry MJ, Nicholson GC, Kotowicz MAJOI. The human cost of fracture. 2005;16(12):2046-52.
2. Court-Brown C, Caeser B. Epidemiology of adult fractures: A Review. Injury. 2006;37.
3. Lee KM, Chung CY, Kwon SS, Won SH, Lee SY, Chung MK, et al. Ankle fractures have features of an osteoporotic fracture. Osteoporosis International. 2013;24(11):2819-25.

- 1  
2  
3  
4 4. Court-Brown CM, Duckworth AD, Clement ND, McQueen MM. Fractures in older  
5 adults. *A view of the future? Injury*. 2018;49(12):2161-6.
- 6  
7 5. Burge RT, Worley D, Johansen A, Bhattacharyya S, Bose U. The cost of osteoporotic  
8 fractures in the UK: projections for 2000–2020. *Journal of Medical Economics*. 2001;4(1-  
9 4):51-62.
- 10  
11 6. Costa M, Achten J, Griffin J, Petrou S, Pallister I, Lamb SE, et al. Effect of Locking  
12 Plate Fixation on 6-Month Disability Among Adults With Displaced Fracture of the Distal  
13 Tibia. The UK FixDT Randomized Clinical Trial. *JAMA*. 2017;318(18):1767-76.
- 14  
15 7. Willett K, Keene DJ, Mistry D, Nam J, Tutton E, Handley R, et al. Close Contact  
16 Casting vs Surgery for Initial Treatment of Unstable Ankle Fractures in Older Adults: A  
17 Randomized Clinical Trial. *JAMA*. 2016;316(14):1455-63.
- 18  
19 8. Costa ML, Griffin XL, Achten J, Metcalfe D, Judge A, Pinedo-Villanueva R, et al.  
20 World Hip Trauma Evaluation (WHiTE): framework for embedded comprehensive cohort  
21 studies. 2016;6(10):e011679.
- 22  
23 9. Fernandez MA, Arnel L, Gould J, McGibbon A, Grant R, Bell P, et al. Research  
24 priorities in fragility fractures of the lower limb and pelvis: a UK priority setting partnership  
25 with the James Lind Alliance. *BMJ Open*. 2018;8(10):e023301.
- 26  
27 10. McPhail S, Dunstan J, Canning J, Haines T. Life impact of ankle fractures:  
28 Qualitative analysis of patient and clinician experiences. *BMC Musculoskeletal Disorders*.  
29 2012;13.
- 30  
31 11. Braun V, Clarke V. What can "thematic analysis" offer health and wellbeing  
32 researchers? *Int J Qual Stud Health Well-being*. 2014;9:26152-.
- 33  
34 12. Liamputtong P. *Handbook of Research Methods in Health Social Sciences*.  
35 Singapore: Springer Nature; 2019.
- 36  
37 13. Kearney RS, McKeown R, Stevens S, Parsons N, Parsons H, Wells P, et al. Cast  
38 versus functional brace in the rehabilitation of patients treated for an ankle fracture: protocol  
39 for the UK study of ankle injury rehabilitation (AIR) multicentre randomised trial. *BMJ Open*.  
40 2018;8(12):e027242.
- 41  
42 14. Yilmaz K. Comparison of Quantitative and Qualitative Research Traditions:  
43 epistemological, theoretical, and methodological differences. *European Journal of Education*.  
44 2013;48.
- 45  
46 15. Griffiths F, Mason V, Boardman F, Dennick K, Haywood K, Achten J, et al.  
47 Evaluating recovery following hip fracture: a qualitative interview study of what is important  
48 to patients. *BMJ Open*. 2015;5(1):e005406.
- 49  
50 16. Hallberg I, Ek A-C, Toss G, Bachrach-Lindström M. A striving for independence: a  
51 qualitative study of women living with vertebral fracture. *BMC Nursing*. 2010;9(1):7.
- 52  
53  
54  
55  
56  
57  
58  
59  
60

- 1  
2  
3  
4 17. Lin CWC, Moseley AM, Refshauge KM. Effects of rehabilitation after ankle fracture: A  
5 cochrane systematic review: European Journal of Physical and Rehabilitation Medicine. 45  
6 (3) (pp 431-441), 2009. Date of Publication: September 2009.; 2009.  
7  
8 18. Gill JR, Lostis E, Bleibleh SS, Hennessy MS, Thondickal F, Gadd RJ, et al. Weight-  
9 bearing in ankle fractures: An audit of UK practice. The Foot. 2019;39:28-36.  
10  
11  
12  
13  
14  
15  
16  
17  
18  
19  
20  
21  
22  
23  
24  
25  
26  
27  
28  
29  
30  
31  
32  
33  
34  
35  
36  
37  
38  
39  
40  
41  
42  
43  
44  
45  
46  
47  
48  
49  
50  
51  
52  
53  
54  
55  
56  
57  
58  
59  
60

For peer review only

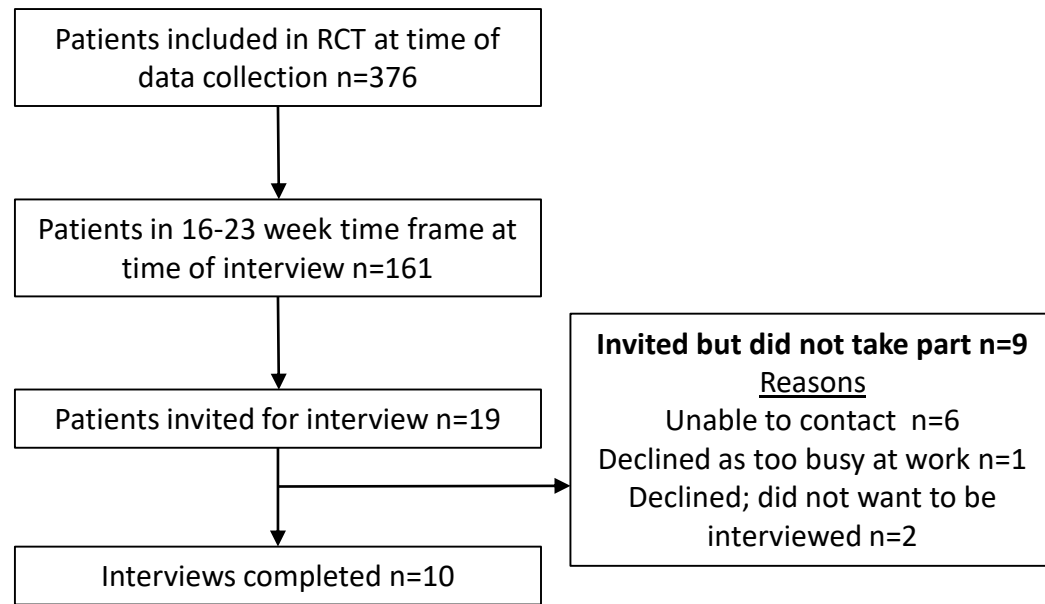



**Standards for Reporting Qualitative Research Checklist (SRQR)**

| Number                    | Topic                                       | Item                                                                                                                                                                                                                                                                                                                                          | Pages number/s |
|---------------------------|---------------------------------------------|-----------------------------------------------------------------------------------------------------------------------------------------------------------------------------------------------------------------------------------------------------------------------------------------------------------------------------------------------|----------------|
| <b>Title and Abstract</b> |                                             |                                                                                                                                                                                                                                                                                                                                               |                |
| S1                        | Title                                       | Concise description of the nature and topic of the study, identifying the study as qualitative or indicating the approach (e.g. ethnography, grounded theory) or data collection ,methods (e.g. interview, focus group) is recommended.                                                                                                       | 1              |
| S2                        | Abstract                                    | Summary of Key elements of the study using the abstract format of the intended publication; typically includes background, purpose, methods, results and conclusions.                                                                                                                                                                         | 1-2            |
| <b>Introduction</b>       |                                             |                                                                                                                                                                                                                                                                                                                                               |                |
| S3                        | Problem formulation                         | Description of significance of the problem/phenomenon studied; review of relevant theory and empirical work; problem statement.                                                                                                                                                                                                               | 3              |
| S4                        | Purpose or research questions               | Purpose of the study and specific objectives or questions                                                                                                                                                                                                                                                                                     | 3              |
| <b>Methods</b>            |                                             |                                                                                                                                                                                                                                                                                                                                               |                |
| S5                        | Qualitative approach and research paradigm  | Qualitative approach (e.g. ethnography, grounded theory, case study, phenomenology, narrative research) and guiding theory if appropriate; identifying the research paradigm (e.g. postpositivist, constructivist/interpretivist) is also recommended; rationale.                                                                             | 4              |
| S6                        | Researcher characteristics and reflectivity | Researchers' characteristics that may influence the research, including personal attributes, qualifications/experience, relationships with participants, assumption, and/or presuppositions; potential or actual interaction between researchers' characteristics and the research questions, approach, methods, results and/transferability. | 5              |
| S7                        | Context                                     | Setting/site and salient contextual factors; rationale.                                                                                                                                                                                                                                                                                       | 4-5            |

|                         |                                             |                                                                                                                                                                                                                                                                                        |      |
|-------------------------|---------------------------------------------|----------------------------------------------------------------------------------------------------------------------------------------------------------------------------------------------------------------------------------------------------------------------------------------|------|
| S8                      | Sampling strategy                           | How and why research participants, documents or events were selected; criteria for deciding when no further sampling was necessary (e.g. sampling saturation); rationale.                                                                                                              | 4    |
| S9                      | Ethical issues pertaining to human subjects | Documentation of approval by an appropriate ethics review board and participant consent, or explanation of lack thereof; other confidentiality and data security issues.                                                                                                               | 3, 5 |
| S10                     | Data collection methods                     | Types of data collected; details of data collection procedures including (as appropriate) start and stop dates of data collection and analysis; iterative process, triangulation of sources/methods, and modification of procedures in response to evolving study findings; rationale. | 5    |
| S11                     | Data collection instruments and techniques  | Description of instruments (e.g. interview guides, questionnaires) and devices (e.g. audio-recorders) used for data collection; if/how the instrument(s) changed over the course of the study.                                                                                         | 4-5  |
| S12                     | Units of study                              | Number and relevant characteristics of participants, documents, or events included in the study; level of participation (could be reported in results)                                                                                                                                 | 6-8  |
| S13                     | Data processing                             | Methods of processing data prior to and during analysis, including transcription, data entry, data management and security, verification of data integrity, data coding and anonymization/deidentification of excerpts.                                                                | 5-6  |
| S14                     | Data analysis                               | Process by which inferences, themes etc. were identified and developed, including researchers involved in the data analysis; usually references as specific paradigm or approach; rationale.                                                                                           | 5-6  |
| S15                     | Techniques to enhance trustworthiness       | Techniques to enhance trustworthiness and credibility of data analysis (e.g. member checking, audit trail, triangulation); rationale.                                                                                                                                                  | 5-6  |
| <b>Results/findings</b> |                                             |                                                                                                                                                                                                                                                                                        |      |
| S16                     | Synthesis and interpretation                | Main findings (e.g. interpretations, inferences, and themes); might include development of a theory or model, or integration with prior research or theory.                                                                                                                            | 9-16 |
| S17                     | Links to empirical data                     | Evidence (e.g. quotes, field notes, text excerpts, photographs) to substantiate analytic findings.                                                                                                                                                                                     | 9-16 |

1  
2  
3  
4  
5  
6  
7  
8  
9  
10  
11  
12  
13  
14  
15  
16  
17  
18  
19  
20  
21  
22  
23  
24  
25  
26  
27  
28  
29  
30  
31  
32  
33  
34  
35  
36  
37  
38  
39  
40  
41  
42  
43  
44  
45  
46

| <b>Discussion</b> |                                                                                              |                                                                                                                                                                                                                                                                                                        |       |
|-------------------|----------------------------------------------------------------------------------------------|--------------------------------------------------------------------------------------------------------------------------------------------------------------------------------------------------------------------------------------------------------------------------------------------------------|-------|
| S18               | Integration with prior work. Implications, transferability, and contribution(s) to the field | Short summary of main findings; explanation of how findings and conclusions connect to, support, elaborate on, or challenge conclusions of earlier scholarship; discussion of scope of application/generalizability; identification of unique contribution(s) to scholarship in a discipline or field. | 16-17 |
| S19               | Limitations                                                                                  | Trustworthiness and limitations of findings.                                                                                                                                                                                                                                                           | 16-17 |
| <b>Other</b>      |                                                                                              |                                                                                                                                                                                                                                                                                                        |       |
| S20               | Conflicts of interest                                                                        | Potential sources of influence or perceived influence on study conduct and conclusions; how these were managed.                                                                                                                                                                                        | 17    |
| S21               | Funding                                                                                      | Sources of funding and other support; role of funders in data collection, interpretation and reporting.                                                                                                                                                                                                | 17    |

From O'Brien, B., Harris, I. and Beckman, T. et al. Standards for Reporting Qualitative Research: A Synthesis of Recommendations. *Academic Medicine*. 2014; 89: 1245-1251

# BMJ Open

## What are the patient experiences of an ankle fracture and the factors of most importance in their recovery? A qualitative interview study.

|                                 |                                                                                                                                                                                                                                                                                                 |
|---------------------------------|-------------------------------------------------------------------------------------------------------------------------------------------------------------------------------------------------------------------------------------------------------------------------------------------------|
| Journal:                        | <i>BMJ Open</i>                                                                                                                                                                                                                                                                                 |
| Manuscript ID                   | bmjopen-2019-033539.R1                                                                                                                                                                                                                                                                          |
| Article Type:                   | Original research                                                                                                                                                                                                                                                                               |
| Date Submitted by the Author:   | 08-Nov-2019                                                                                                                                                                                                                                                                                     |
| Complete List of Authors:       | McKeown, Rebecca; University of Warwick Warwick Medical School, Kearney, Rebecca; University of Warwick, Warwick Clinical Trials Unit Liew, Zi Heng; University of Warwick, Warwick Clinical Trials Unit, Warwick Medical School<br>Ellard, David; University of Warwick, Clinical Trials Unit; |
| <b>Primary Subject Heading</b>: | Qualitative research                                                                                                                                                                                                                                                                            |
| Secondary Subject Heading:      | Rehabilitation medicine, Patient-centred medicine                                                                                                                                                                                                                                               |
| Keywords:                       | Foot & ankle < ORTHOPAEDIC & TRAUMA SURGERY, QUALITATIVE RESEARCH, Ankle fractures, ankle injury, interviews, quality of life                                                                                                                                                                   |
|                                 |                                                                                                                                                                                                                                                                                                 |

SCHOLARONE™  
Manuscripts

1  
2  
3  
4  
5  
6  
7  
8  
9  
10  
11  
12  
13  
14  
15  
16  
17  
18  
19  
20  
21  
22  
23  
24  
25  
26  
27  
28  
29  
30  
31  
32  
33  
34  
35  
36  
37  
38  
39  
40  
41  
42  
43  
44  
45  
46  
47  
48  
49  
50  
51  
52  
53  
54  
55  
56  
57  
58  
59  
60

# What are the patient experiences of an ankle fracture and the factors of most importance in their recovery? A qualitative interview study.

## AUTHOR INFORMATION

R. McKeown (Corresponding Author) Warwick Clinical Trials Unit, Warwick Medical School, University of Warwick, Clinical Sciences Research Laboratories, University Hospitals Coventry and Warwickshire, CV2 2DX, UK. [r.mckeown.1@warwick.ac.uk](mailto:r.mckeown.1@warwick.ac.uk) 07969116187 ORCID: <https://orcid.org/0000-0002-3502-2328>

R.S. Kearney, Warwick Clinical Trials Unit, Warwick Medical School, University of Warwick, Clinical Sciences Research Laboratories, University Hospitals Coventry and Warwickshire, CV2 2DX, UK. [r.s.kearney@warwick.ac.uk](mailto:r.s.kearney@warwick.ac.uk)

Z.H. Liew, Warwick Clinical Trials Unit, Warwick Medical School, University of Warwick, Clinical Sciences Research Laboratories, University Hospitals Coventry and Warwickshire, CV2 2DX, UK. [zi.liew@warwick.ac.uk](mailto:zi.liew@warwick.ac.uk)

D.R. Ellard, Warwick Clinical Trials Unit, Warwick Medical School, University of Warwick, Clinical Sciences Research Laboratories, University Hospitals Coventry and Warwickshire, CV2 2DX, UK [d.r.ellard@warwick.ac.uk](mailto:d.r.ellard@warwick.ac.uk)

## WORD COUNT

5470 (excluding title page, abstract, references, figures and tables)

## ABSTRACT

### Objective

The objective of this qualitative research study is to explore the patient experiences of ankle fracture and the factors of most importance to them in recovery.

### Design

Semi-structured interviews exploring the patient experiences of ankle fracture recovery at 16-23 weeks following injury. Interviews followed a topic guide and were recorded with an encrypted audio recorder and then transcribed verbatim. Thematic content analysis was used to identify themes in the data.

### Setting

Individuals were recruited from a sample of participants of a UK-based clinical trial of immobilisation methods for ankle fracture. Interviews were conducted at the participants own homes or on a university campus setting.

### Participants

A purposive sample was used to account for key variables of age, gender and fracture management. Participants recruited from the clinical trial sample were adults aged 18 years or over with a closed ankle fracture.

### Results

Ten participants were interviewed, five of whom were female and six of whom had an operation for their ankle fracture. The age range of participants was 21-75 years with a mean of 51.6 years. Eight themes emerged from the data during analysis; mobility, loss of independence, healthcare, psychological effects, social and family life, ankle symptoms, sleep disturbance and fatigue and activities of daily living. Factors of importance to participants included regaining their independence, sleep quality and quantity, ability to drive, ability to walk without walking aids or weight bearing restrictions and radiological union.

## Conclusions

The results of this research demonstrates the extensive impact of ankle fracture on individuals' lives, including social and family life, sleep, their sense of independence and psychological wellbeing. The results of this study will enable an increased understanding of the factors of relevance to individuals with ankle fracture, allowing collection of appropriate outcomes in clinical studies for this condition. Ultimately these results will help to formulate appropriate patient centred rehabilitation plans for these patients.

## Keywords

Ankle fractures, ankle injury, interviews, qualitative research, quality of life, patient centred care.

## STRENGTHS AND LIMITATIONS OF THIS STUDY

- Use of well recognised reporting standards for purposes of transparency.
- Duplicate data analysis for consistency.
- Use of purposive sampling to account for key demographic variables.
- Participants were recruited from a clinical trial which restricted the timing of data collection.

## BACKGROUND

Ankle fractures are significant injuries which cause pain and reduced mobility (1). The injury demonstrates a bimodal distribution, usually affecting younger males and older females (2, 3). The incidence of ankle fracture is increasing and they contribute to the rising economic cost of managing fractures in the current ageing population (4). This cost of managing fractures in the UK is expected to reach £2.2 billion per annum by the year 2020 (5). Whilst several clinical effectiveness trials have been recently published to ascertain the optimal management strategies for individuals with fractures of the lower limbs (6-8), there is comparably less research into the patient experiences of recovering from these injuries. In 2018 a James Lind Alliance priority setting partnership on the subject of lower limb fractures in older people was completed and the sixth priority listed in this research area was "what is most important to adults in their recovery from a fragility fracture of the lower limb?" (9). This highlights the demand not only from academics and clinicians, but also patients and members of the public for further research in this area.

1  
2  
3 The life impact of ankle fractures has been previously assessed in an article including interviews of  
4 patients and clinicians in the context of outcome measure development (10). In this article we focus  
5 on patients only, with the aim of understanding their experience of ankle fracture recovery as well  
6 as the factors of most importance to them. This will enable a greater understanding of the patient  
7 experience of recovery from this injury, to ensure that domains of interest to participants are being  
8 collected in the trials to assess clinical effectiveness of interventions for this injury. Furthermore, this  
9 will enable clinicians to achieve a broader knowledge base of the experiences of individuals with this  
10 injury and enable appropriate and effective patient centred treatment plans to be formulated for  
11 these patients.  
12  
13  
14  
15  
16  
17  
18

## 19 **Objectives**

20  
21  
22 The objective of this qualitative study is to explore the patient experiences of ankle fracture and the  
23 factors of most importance to them during recovery.  
24  
25

## 26 **METHODS**

27  
28  
29 This research was conducted in accordance with the Standards for Reporting Qualitative Research  
30 (SRQR) checklist (11) (supplementary file 1).  
31  
32  
33

### 34 **Ethical Approval**

35  
36  
37 Ethical approval was gained through substantial amendment to the Ankle Injury Rehabilitation (AIR)  
38 trial protocol (ISRCTN15537280) from the West Midlands Edgbaston NHS Research Ethics Committee  
39 on 07/09/2018 (reference: 17/WM/0239).  
40  
41  
42

### 43 **Study Design and Methodological Approach**

44  
45  
46 We completed semi-structured interviews with individuals who had sustained an ankle fracture at a  
47 single time point between 19 and 23 weeks following injury. The qualitative approach used here was  
48 the thematic content analysis to focus on the participants' experience of their injury (12). We took a  
49 realist approach to the analysis, acknowledging that the individuals' ankle injuries exist in a reality  
50 outside of their own perception of it (13).  
51  
52  
53  
54

### 55 **Participant Identification**

56  
57  
58 This study was embedded in the AIR trial, an ongoing randomised controlled trial comparing plaster  
59 cast to functional brace in the treatment of individuals with an ankle fracture (14). Participants of  
60



the trial were adults aged 18 years or over who had a closed ankle fracture either managed operatively or non-operatively. The eligibility criteria for the trial can be found in table 1.

| Inclusion criteria                                                                                                  | Exclusion Criteria                                                                                     |
|---------------------------------------------------------------------------------------------------------------------|--------------------------------------------------------------------------------------------------------|
| Able to give written informed consent                                                                               | Ankle fracture secondary to known metastatic disease                                                   |
| Aged 18 years or over                                                                                               | Complex intra-articular fracture (e.g. Pilon fracture)                                                 |
| A closed ankle fracture for which the treating clinician would consider plaster cast a reasonable management option | In the opinion of the surgeon the patient would require manipulation and close contact/moulded casting |
| Randomised within 3 weeks of operative management or injury if non-operative                                        | Wound complications contraindicating functional brace intervention                                     |
|                                                                                                                     | Previous ankle fracture already randomised in the present trial                                        |
|                                                                                                                     | Known pre-existing neuropathic joint disease contraindicating functional brace intervention            |
|                                                                                                                     | Unable to adhere to trial procedures or complete postal questionnaires                                 |

Table 1 - Eligibility criteria of the AIR Trial

## Sampling

We used purposive sampling for this research study. Participants who had previously stated that they were willing to be contacted for further research into ankle fractures were considered for invitation to the study. Participants were approached after completion of the 16 week questionnaire in the trial follow up schedule as this was the primary outcome for the study. Interviews were completed after this time point to ensure that the interview did not influence the way in which participants answered the trial questionnaire. The sampling strategy allowed for a diverse range of patients with regards to their age, gender, fracture management (operative or non-operative) and allocated intervention within the trial (functional brace or plaster cast).

## Recruitment and Consent

The participants of the trial were screened for sampling attributes of age, gender, fracture management and randomised intervention. Invitation letters and participant information sheets

were sent out to those meeting the sampling requirements and in the letter stated that we would telephone them in one weeks' time to discuss the study. During the phone call, participants were given the opportunity to ask any questions. If they verbally consented to participate, a mutually convenient interview date and time was arranged between the interviewer and participant. At the interview consultation, the participant was given a further opportunity to ask questions. Once these had been answered satisfactorily they signed a consent form to confirm their willingness to participate. Participants were informed that they had the opportunity to withdraw their data at any time throughout the interview or up to 72 hours following the interview.

### Data Collection Process

The interviews were completed by the lead author (RM), a female physiotherapist currently working as an academic researcher towards completion of a PhD. The interviewer had no previous relationship with the participants and did not inform the participants of her background as a physiotherapist to avoid this influencing participant responses. Interviews were completed at a mutually agreeable time in the participants own homes or in university meeting rooms where this was not possible. A topic guide was produced and followed throughout each interview to ensure consistency between interviews. Examples of the questions asked can be found in Table 2. Field notes were taken throughout the data collection and analysis to maintain reflexivity during the project. Interviews were completed from 12/10/2018 to 03/04/2019 and continued until no new themes were emerging from the data.

| Example questions used in interviews                                                       |
|--------------------------------------------------------------------------------------------|
| Could you explain how your ankle fracture has impacted your day to day life?               |
| How has your ankle fracture affected your walking?                                         |
| Could you talk to me about the impact of your ankle fracture on your family life?          |
| Could you explain what was most important to you when recovering from your ankle fracture? |
| What bothered you most throughout your recovery from your injury?                          |
| You mentioned that...was an important factor to you. Could you tell me more about that?    |
| Did your ankle fracture affect your mood in any way?                                       |
| How did your ankle fracture affect your work?                                              |
| How did your ankle fracture affect your leisure activities or use of free time?            |

Table 2: Example questions used during the interviews

## Data Analysis

Interviews were recorded with the use of an encrypted digital audio-recorder for which the lead researcher only had access to. Interview recordings were then downloaded to a secure server and were password protected only accessible to the lead researcher. The interviews were transcribed verbatim and all identifiable information were removed to ensure participant confidentiality. Interviews transcripts were stored on a secure server and pseudonymised by a unique study ID number. Once transcribed, interviews were uploaded to NVivo (NVivo12, QSR International) for analysis. We used thematic analysis to analyse the data. A second researcher (ZHL) duplicated the coding process in a sample of four of the interviews to ensure dependability and consistency in the analysis process (15). Transcripts were coded independently and then each interview transcript was discussed between the researchers to ensure agreement. Any sections of the transcripts which we did not agree on the coding for were discussed to reach consensus agreement on the most appropriate code to use in that section. We performed the analysis concurrently with the data collection and interviews were terminated when no new themes were emerging from the data.

## Patient and Public Involvement

Patient and public involvement representatives who were involved in the design and conduct of the randomised controlled trial (Karen Keates and Richard Grant) from Warwick University User Teaching and Research Partnership provided consultation during protocol development, taking an active role in reviewing and commenting on the interview study processes and associated burden of the study on participants. They provided consultation on the patient facing materials used in this qualitative study, including the patient information sheet, invite letter and topic guide to ensure suitability. Karen and Richard will be collaboratively involved in planning the dissemination of results to participants alongside the results of the AIR trial when available.

## RESULTS

A total of 19 participants were invited to take part in this study. Nine declined participation and ten participants were recruited and interviewed as part of this study. The recruitment flowchart is found in figure 1 which shows the reasons for non-participation in the interview study. The age range was 21-75 years with a mean of 51.6 years. After eight interviews, no new themes emerged from the data and therefore we completed two more interviews to ensure no further themes arose from the interviews. We terminated the interviews at ten participants as there were no further themes in the remaining two transcripts. Participant demographics and injury information are found in Table 3.

<<FIGURE 1 HERE>>

For peer review only

1  
2  
3  
4  
5  
6  
7  
8  
9  
10  
11  
12  
13  
14  
15  
16  
17  
18  
19  
20  
21  
22  
23  
24  
25  
26  
27  
28  
29  
30  
31  
32  
33  
34  
35  
36  
37  
38  
39  
40  
41  
42  
43  
44  
45  
46  
47  
48  
49  
50  
51  
52  
53  
54  
55  
56  
57  
58  
59  
60

| Participant ID | Time since injury   | Participant age (years) | Gender (M/F) | Fracture Management (Operative or non-operative) | Allocated Interventions | Any other injuries         | Mechanism of Injury                  | Occupation                      |
|----------------|---------------------|-------------------------|--------------|--------------------------------------------------|-------------------------|----------------------------|--------------------------------------|---------------------------------|
| 01             | 22 weeks            | 48                      | F            | Operative                                        | Functional Brace        | None                       | Low energy fall                      | Teacher                         |
| 02             | 22 weeks<br>6 days  | 59                      | M            | Operative                                        | Plaster Cast            | None                       | Low energy fall                      | Maintenance worker              |
| 03             | 21 weeks            | 75                      | F            | Non-operative                                    | Plaster Cast            | None                       | Low energy fall                      | Retired, volunteers for charity |
| 04             | 19 weeks,<br>1 day  | 37                      | M            | Non-operative                                    | Plaster Cast            | None                       | Low energy fall                      | University lecturer             |
| 05             | 21 weeks            | 29                      | F            | Operative                                        | Plaster Cast            | Contralateral ankle sprain | High energy fall doing gymnastics    | Nurse                           |
| 06             | 20 weeks,<br>4 days | 60                      | M            | Non-operative                                    | Functional Brace        | None                       | High energy fall whilst wakeboarding | Retired                         |

|    |                     |    |   |               |                     |                                      |                                                   |                               |
|----|---------------------|----|---|---------------|---------------------|--------------------------------------|---------------------------------------------------|-------------------------------|
| 07 | 21 weeks,<br>6 days | 73 | F | Operative     | Plaster Cast        | Ipsilateral<br>calcaneal<br>fracture | High energy<br>fall from loft<br>ladder           | Part time job<br>in a shop    |
| 08 | 21 weeks,<br>4 days | 45 | M | Non-operative | Functional<br>Brace | Contralateral<br>ankle sprain        | On a push<br>bike which<br>collided with<br>lorry | Works for car<br>manufacturer |
| 09 | 22 weeks,<br>3 days | 69 | F | Operative     | Functional<br>Brace | Wrist<br>fracture                    | Low energy<br>fall                                | Retired                       |
| 10 | 20 weeks,<br>2 days | 21 | M | Operative     | Functional<br>Brace | None                                 | High energy<br>fall from<br>moving<br>vehicle     | Undergraduate<br>Student      |

Table 3: Participant demographics and injury information.

1  
2  
3 During analysis, eight themes emerged from the data; mobility, loss of independence, healthcare,  
4 ankle symptoms, sleep disturbance and fatigue, family and social life, psychological effects, and  
5 activities of daily living.  
6  
7

## 8 9 **Mobility**

10  
11  
12 Participants described their difficulty in walking “normally” and getting around, usually describing  
13 this as frustrating or inconvenient. Many spoke about their reduced mobility in the context of their  
14 weight bearing restrictions and walking aids, which were usually discussed inextricably. The  
15 frustration caused by walking aids and weight bearing restrictions were especially evident in the  
16 older participants of the study, many of whom described this as the most difficult part of their  
17 fracture for them. Several individuals explained that the weight bearing restrictions were too  
18 difficult to adhere to and described how they were not following the weight bearing restrictions  
19 advised by their clinician for this reason. Individuals described using walking aids as slow and hard-  
20 work, requiring frequent rests and some noted their frustration with the sudden inability to carry  
21 things. However, people also spoke of their walking aids as a necessary inconvenience,  
22 acknowledging that they were essential during periods of weight bearing restrictions. Older  
23 participants discussed a fear of falling, usually when leaving the house or out in busy public places.  
24 Some described the difficulty in not being able to drive, explaining how that was an important factor  
25 in their recovery for them.  
26  
27

28  
29  
30 Pt09: *“Just stuck here...I felt like a prisoner in my own home I think for the first four weeks...”*

31  
32  
33 Pt07: *“I used to dream of walking [the dog] down the park. Yeah...I would be...you know...dream  
34 about it. Erm [pause] just...just to be on two feet that was my sort of you know [pleading] ‘please let  
35 me get onto two feet’”*

36  
37  
38 Pt03: *“Yes because you know I thought crutches were easy things to use. But as I say to have to hop  
39 at my age is a very hard thing to do...”*

40  
41  
42 Pt10: *“You couldn’t go more than a hundred...two hundred metres without stopping because it just  
43 puts so much pressure on your hands.”*

44  
45  
46 Pt01: *“the worst was when I wasn’t able to drive; once I was able to drive again I think that was a  
47 turning point.”*  
48  
49  
50  
51  
52  
53  
54  
55  
56  
57  
58  
59  
60

## Loss of Independence

A loss of independence and subsequent reliance on others was spoken about by all participants, which was required for household tasks, care of dependents or transport. For some this was a significant source of frustration. Some individuals identified the need to rely on others as a cause of low mood and described how the ability to regain independence was of vital importance for their mental wellbeing. For others, the need to rely on others was less bothersome and something they described as adjusting to. The need to rely on others also was also discussed as causing tension with others in the household. Despite needing to rely on others for some things, people also described adapting the way they did things in order to retain their independence as much as possible.

Pt01: *"I think that's the thing that got me down the most having to rely on others to come and take you out and you know which...which people were absolutely brilliant but I'm quite independent and...and I...that was hard"*

Pt09: *"...for mental reasons it's good to get back to normal erm that was quite important for me to feel as though I was able to take charge of my own life again. Erm yeah rather than relying on other people."*

Pt10: *"I dunno you just get a bit claustrophobic everyone doing everything for you."*

Pt05: *"The worst part was not being able to do things when I wanted how I wanted that was the worst definitely."*

Pt05: *"He was having to do everything and I would sit and stare at the washing up and I couldn't do it and it was so frustrating because I like a clean house."*

## Ankle Symptoms

Individuals spoke of troublesome symptoms around their ankle to varying degrees, including pain, skin changes, wound issues, swelling, reduced movement and loss of strength and muscle bulk. Whilst many individuals felt it was important to not be in pain, many described their pain as manageable and controllable, which didn't prevent them from performing functionally. Skin changes including dry skin around the ankle were noted, particularly by those participants who received a plaster cast. One individual became very concerned with the development of pressure sore from the plaster cast which kept them awake at night. Several people discussed the swelling in their foot and ankle, often attributing this to a difficulty in finding suitable footwear. Almost all participants



1  
2  
3 interviewed described a heightened awareness of their ankle, especially when discussing being out  
4 in public spaces, walking on uneven surfaces or returning to physical activity.  
5

6  
7 Pt06: *"I still carried on. I mean really it was not...on a scale of one to ten...it was never more than a*  
8 *sort of four or a five to be honest."*  
9

10  
11 Pt01: *"...and like I say of an evening if I...to come in from work not feel that it's swollen and not feel*  
12 *that it's uncomfortable erm then I think that perhaps that would be a hundred percent recovery."*  
13

14  
15 Pt05: *"Err that...the first time I think I was really concerned about the heel I was convinced it was*  
16 *numb because the cast was too tight and the fact that I couldn't look at it...I couldn't get to it...I*  
17 *couldn't see it. Errm I was convinced absolutely convinced that I was getting all sorts of you know*  
18 *pressure sores...blisters."*  
19

20  
21  
22 Pt09: *"I've got very good flexibility in my ankle but not much strength. So that's what I'm working*  
23 *on."*  
24

## 25 26 27 **Sleep Disturbance and Fatigue**

28  
29 Participants described disturbed sleep and increased fatigue in their recovery period from the ankle  
30 fracture. Individuals described difficulty getting to sleep or waking during the night due to pain.  
31 Those who had a plaster cast described a difficulty in getting comfortable at night because of this.  
32 Some described a general increase in fatigue because of the increased effort that walking took.  
33 Many spoke about sleep in the context of their medication, with some individuals using pain  
34 medication to aid with sleep. Others described how the sleep issues and subsequent tiredness  
35 affected their performance at work. Some felt that the effect on sleep was one of the more  
36 important factors in their ankle fracture recovery.  
37

38  
39 Pt04: *"Erm I think the loss of sleep was the worst. Yeah...it wasn't it wasn't even so much the pain*  
40 *itself as the fact that I wasn't sleeping properly and I was tired all the time for a few weeks I think*  
41 *that was the worst."*  
42

43  
44 Pt02: *"I think it stopped me from...yeah I think it stopped me from sleeping so much. I just couldn't*  
45 *get it comfortable at all... it's when it was in the cast was the main thing, getting it comfortable in*  
46 *the cast."*  
47

## 48 49 50 51 52 53 54 55 **Psychological Effects**

56  
57 Psychological effects were discussed to varying degrees between participants in this study. Many  
58 described their difficulty moving around and need to rely on others as causing feelings of frustration  
59  
60

1  
2  
3 and this was a commonly described emotion. Some described feelings of depression and low mood  
4 attributed to their injury and limitations it caused. One individual described an emotional lability  
5 during their recovery period, explaining how they would cry a lot more readily than usual  
6 throughout the recovery. Several people described an anxiety regarding the long term function of  
7 their ankle. Younger participants particularly described this anxiety when discussing valued activities  
8 such as sports and leisure. The older participants were more concerned with getting back to usual  
9 function in terms of walking and driving, explaining their hopes of regaining their pre-fracture level  
10 of independence. There were some individuals who did not report any mood changes as a result of  
11 their fracture. Some individuals reported issues with body image and voiced concerns regarding  
12 their inability to exercise and the impact that might have on their weight. Others spoke of their  
13 injury and associated limitations in relation to feeling old or referencing the ageing process when  
14 discussing their recovery.  
15  
16  
17  
18  
19  
20  
21  
22  
23

24 Pt09: *"Yeah. Tearful. Yeah. Not so much when I was out 'cos you don't do that. But yeah. It's just a*  
25 *horrible feeling...just...I don't...it's so difficult to be able to pin point exactly what it is that actually*  
26 *brings the tears on. I was low...very low."*  
27  
28  
29

30 Pt03: *"Yeah but it did make me depressed at times yeah."*  
31

32 Pt05: *"Any anxieties I had at that time were around long term recovery. I mean I probably could have*  
33 *been happier but I wouldn't have gone so far as to say I was actually depressed."*  
34  
35

36 Pt08: *"I was anxious...Yeah but it's just it...well it's alright now but at the time I remember thinking...I*  
37 *was...I was quite frightened 'cos it was really painful."*  
38  
39

40 Pt05: *"...and that is so important to me to be able to get back to that...to be fit you know so I'm quite*  
41 *weight conscious. I'm very conscious of the fact that I don't want to get fat sitting around and not*  
42 *doing anything."*  
43  
44

45 Pt03: *"Errm one of these elderly people's push about things in the house [pause] and I just get it into*  
46 *my mind that I'm not old enough for one of them yet [laughs] so that was very disheartening yeah to*  
47 *use that."*  
48  
49  
50

## 51 **Activities of Daily Living**

52

53  
54 Participants described their difficulty or inability to complete their activities of daily living, such as  
55 personal care, household tasks, work and leisure activities. When discussing personal care and  
56 washing and dressing, many people spoke of finding new routines and adapting to new ways of  
57 doing things. Individuals discussed these in relation to their walking aids and weight bearing status,  
58  
59  
60

1  
2  
3 stating that these factors meant that the process of washing and dressing took much longer. Those  
4 who received the functional brace spoke of the benefit of removing the brace for washing. Those  
5 who received a plaster cast discussed the need to use a cast cover for washing. Some female  
6 participants spoke of the frustration of not being able to shave their leg due to the irremovable cast.  
7  
8

9  
10 Pt09: *"...fortunately they could take me to the toilet on a like a wheelie commode thing which sort of*  
11 *slots over the toilet so that wasn't too bad in that respect but it's still...[sighs] it's something we don't*  
12 *like I suppose isn't it? You know the personal things...going to the toilet...washing...somebody had to*  
13 *shower me but you know I...I was OK."*  
14  
15

16  
17 Pt04: *"Getting in the shower was a pain...I'm kind of hopping over a slippery floor in the shower erm*  
18 *with a weird pose to make sure I'm not putting too much weight on my leg. Erm so it took much*  
19 *longer to shower."*  
20  
21

22  
23 Pt05: *"I wanted to shave my leg...I wanted to wash it properly...the first thing I did when I got home I*  
24 *took it off had a shower shaved my leg it was disgusting. My other half nearly divorced me over the*  
25 *state of my leg! [laughs]"*  
26  
27

28  
29 Household tasks were severely restricted by participant's injuries and many spoke of these in the  
30 context of their walking aids, as they did not have hands free to carry things. Many spoke of relying  
31 on others for completion of essential tasks such as meal preparation and grocery shopping. Some  
32 spoke of adaption in doing things such as housework by getting on their hands and knees to  
33 complete tasks. Many people described how others took on the majority of the house work and  
34 caring for any dependents. Some people found a source of frustration in the standards of the other  
35 person completing the housework, which did not match their own personal standards.  
36  
37

38  
39 Pt10: *"I remember the most frustrating thing...it was just the little things just having a big bag of*  
40 *washing on the top floor and I couldn't put it on the handle of the crutch and peg it down so I had to*  
41 *call someone up and they had to come and cart it down for me."*  
42  
43

44  
45 Pt05: *"Yeah well I was lucky my wife basically took over everything. We try and share most things*  
46 *and I was...I was totally just not contributing at all so I mean as typical evening routine now I would*  
47 *help get the kids to bed I would help bath them I'd help give them dinner and whilst she's getting the*  
48 *baby to sleep I'd do the washing up and Hoover and erm pack the bags for tomorrow things like that*  
49 *so for a few weeks that almost went out the window."*  
50  
51

52  
53 Pt07: *"Erm yes I discovered that if I got on my knees...hands and knees [pause] I could actually...not*  
54 *Hoover...but I could get a stick brush and sweep the carpet. Erm I did that for quite a while. And then*  
55 *you had to make sure that you were near something so that I could get back up again. I also did*  
56  
57  
58  
59  
60

1  
2  
3 *gardening on my hands and knees because it was...to see it just going...it was heart-breaking. And I*  
4 *thought 'right if I could get out there I'm sure if I'd got something to kneel on I can actually do that'*  
5 *and I did."*  
6  
7

8  
9 In terms of leisure time, many people were restricted from participating in their usual leisure  
10 activities due to their injury and used this free time for more sedentary activities instead. For some  
11 this was acceptable but this was a source of frustration for others, who described a dislike for  
12 "sitting around". Those who were normally physically active discussed their anxieties with returning  
13 to these activities and discussed feelings of caution and heightened awareness in their ankle  
14 associated with their return to sports and exercise. Those with more sedentary hobbies reported  
15 little or no impact on these. Several people spoke of having to miss holidays due to their injury. For  
16 those who worked, many people spoke of needing to reduce working hours or be off work due to  
17 their injury. Those who were able to work from home discussed doing so throughout the recovery  
18 period. Some discussed the financial implications of not working, which was a concern for some.  
19  
20  
21  
22  
23  
24  
25

26 Pt06: *"Errm errrm but apart from that it was obviously a massive limitation on doing all the sport I*  
27 *like to do. Errm so that was....it sort of drove me a bit mad."*  
28  
29

30 Pt09: *"...you know when you've got the opportunity maybe to sit and watch television all day or read*  
31 *all day or whatever but you don't...mentally you don't feel like doing that either?"*  
32  
33

34 Pt07: *"I mean I do sewing...I make bags and that...well of course I just hadn't got the strength in that*  
35 *foot to press the pedal down on the machine [pause] so I couldn't do...yeah anything like that."*  
36  
37  
38

## 39 **Family and Social Life**

40  
41 Many individuals discussed the impact that their ankle fracture had on their usual social and family  
42 life. The majority of individuals described how they were unable to go out independently to meet  
43 others and instead people would come to visit them. Some described a reduction in alcohol  
44 consumption because of this and additionally due to the pain medication they were taking. Some  
45 described how their social life improved as they saw family more as they were always checking in to  
46 help them. Some individuals described how their low mood meant they didn't feel up to socialising  
47 as much as usual. In terms of family life, many of the participants spoke of a need to adapt usual  
48 roles and responsibilities in light of their injury. A few individuals mentioned the tensions this could  
49 sometimes cause in their relationships with others. The impact on the family and family activities  
50 were also discussed, such as adapting childcare responsibilities and activities usually done as a  
51 family. Several individuals took time to explain their concern with the strain and pressure this put on  
52 other members of the household or wider family, who were taking on more workload than usual.  
53  
54  
55  
56  
57  
58  
59  
60

1  
2  
3 Those with childcare responsibilities spoke of the psychological impact of not being able to perform  
4 the role they would usually perform for their children.  
5

6  
7 Pt09: *"I was totally reliant either on [husband] or on friends to pick me up...take me out but again  
8 you don't feel like doing the things. Erm people would say 'Ooh you know come and do this.' And you  
9 think 'Oh I don't want to be out in company' but we did I mean we forced ourselves to. Erm so yes it  
10 did impact on it but only probably because we allowed it to in the sense that we didn't want to go  
11 anywhere."*  
12  
13

14  
15 Pt01: *"I suppose the most frustrating thing for me really was that erm [name of child] my eldest was  
16 doing his A-Levels and so I was unable to take him backwards and forwards because, he was...he was  
17 at [school name], I was unable to drive him to his exams so my dad he was brilliant he stepped in  
18 but...just little things like that it just makes you feel a little bit [pause]...you....psychologically you feel  
19 like you're not able to perform the role that you normally perform sort of thing so..."*  
20  
21  
22

23  
24 Pt 05: *"Having to spend so much time with my mum that we started to grate on each other's nerves  
25 after a while and in the end you just think 'I'd rather just stay indoors than have to go round and  
26 have another argument with mum because I've seen her every day for the last two weeks'."*  
27  
28  
29

## 30 31 Healthcare

32  
33 Individuals discussed their experiences of the healthcare they received for their ankle fracture.  
34 Many of the participants praised the services provided and staff providing them during their  
35 recovery period. Those who required an inpatient stay for their injury described these experiences  
36 as lonely or difficult, usually due to other patients in the ward with them. Fracture clinic experiences  
37 were generally positive, with some individuals expressing confusion about seeing a different clinician  
38 to the one who performed their fracture fixation operation. Those who received physiotherapy  
39 generally recounted this as a useful experience, describing it as solution focussed and helpful in  
40 providing education and reassurance about their injury. Others described physiotherapy as slow and  
41 hard work. Those who were not offered physiotherapy explained how they felt they would have  
42 benefitted from it or felt they still needed some physiotherapy intervention. For one individual,  
43 when asked about the factors of most importance to them, they responded that the radiographic  
44 outcome was important and being able to see that the bone had healed on the radiographs was the  
45 most important factor to them in their recovery.  
46  
47  
48  
49  
50  
51  
52  
53  
54  
55

56 Pt02: *"Well when they took the cast off the only thing that did concern me; I didn't have the same  
57 surgeon looking at it. I was expecting the same one as he did it just to say it was ok but erm I thought  
58  
59  
60*

1  
2  
3 *that was pretty strange. Usually you get the same surgeon all the way through the same doctor all*  
4 *the way through.”*  
5  
6

7 Pt01: *“She [physiotherapist] was absolutely brilliant really, really good and I think that just helped as*  
8 *well just having somebody you know showing you the things you could do but also say... you could*  
9 *just give you the confidence that yes you are fine to walk on it it’s not going to [pause] do anything or*  
10 *whatever so that...I think...I think the physio is really important.”*  
11  
12  
13

14 Pt10: *“No that’s the only thing really they never offered me physio. Erm whether they felt I didn’t*  
15 *need it or anything I’m not sure. Or whether that’s something you have to pursue privately I don’t*  
16 *know. But no they never really offered it or spoke about it... but my Mum said ‘you should probably*  
17 *get some’ but I just never really followed it up.”*  
18  
19  
20

21 Pt08: *“Oh seeing the radiographs ‘cos I wanted to see the bone...solid again. And every time I kept*  
22 *going back and just seeing the gap...that was the target I wanted to see a radiograph that looked like*  
23 *it didn’t have a split down the bone. But that was the initial thought it was like let’s see the*  
24 *radiographs...when that crack’s gone I’m...I’m well again”*  
25  
26  
27  
28  
29

## 30 DISCUSSION

31  
32

33 The results of this qualitative study shows that individuals experience a wide range of concerns  
34 related to their ankle fracture, including the usual symptoms of pain and reduced mobility.  
35 Individuals also described effects on psychological wellbeing, sleep, their sense of independence and  
36 family and social life. The factors of most importance discussed by the participants here ranged from  
37 regaining independence, improving sleep quality and quantity, ability to drive or get out and about,  
38 no longer requiring the use of walking aids or needing to follow weight bearing restrictions. Some  
39 were also concerned with the radiographic outcome during their recovery. There was variations in  
40 experience in relation to the age of participants; older individuals described a more intense difficulty  
41 in adhering to weight bearing restrictions, coping with the loss of independence and reported more  
42 severe psychological effects than the younger individuals interviewed here. Considering the  
43 significant difficulty that older individuals face in tolerating weight bearing restrictions there is a  
44 need for further research into the most appropriate weight bearing protocols for ankle fractures,  
45 which is unclear and there is evidence of inconsistency in clinical practice (16-18). In some cases,  
46 weight bearing may provide more benefits than harm and further evaluation of these protocols are  
47 warranted. In instances where weight bearing restrictions are deemed essential, consideration of  
48 alternative or innovative walking aids would be helpful to ensure restrictions are able to be adhered  
49 to. The provision of physiotherapy between participants was inconsistent and the evidence for  
50  
51  
52  
53  
54  
55  
56  
57  
58  
59  
60

1  
2  
3 rehabilitation protocols following ankle fracture are similarly unclear in the literature (16). Research  
4 to identify the most effective physiotherapy interventions, for which patients and during what time  
5 frame is warranted to standardise care. Furthermore, the prevalence of psychological effects such as  
6 anxiety and depression which were reported here indicates that a more holistic approach to  
7 intervention is required following trauma.  
8  
9

10  
11  
12 The strengths of this study include the exploration of a burdensome condition which is increasing in  
13 prevalence. Exploring the factors of most importance to individuals with ankle fracture in such a  
14 widely studied injury is important in ensuring we are collecting relevant and important outcomes for  
15 individuals with this injury, as well as providing clinical care which is sensitive to issues most  
16 pertinent to them. We used a purposive sample to interview a representative sample of the  
17 population of adults with ankle fractures and duplicated the data analysis for purposes of  
18 consistency. A weakness of this study is that the timing of the interviews were limited by the primary  
19 outcome time point of the trial. If this was not a constraint, it would have been beneficial to  
20 interview at regular time periods from time of injury to ensure that participants could be  
21 interviewed throughout recovery period, rather than requiring the participants to recall information  
22 from their whole recovery experience. Furthermore, the lead researcher (RM) and second coder  
23 (ZHL) are both physiotherapists by background. Whilst every effort was made to ensure researcher  
24 reflexivity throughout the process of the study, as with all qualitative enquiry, the researchers'  
25 professional background will likely have influenced the interpretation of data.  
26  
27  
28  
29  
30  
31  
32  
33  
34  
35

36 This study compares to another qualitative study completed with those with ankle fracture (10) who  
37 also demonstrated wide ranging effects on individuals with ankle fracture, including social and  
38 psychological impacts as well as activities of daily living. There were some differences of this study,  
39 in that here we focussed only on patients with an ankle fracture, whereas the previous research also  
40 interviewed clinicians. This article adds the concepts and factors of most importance to individuals'  
41 with an ankle fracture, contributing further to this research area. Other research into patient  
42 experience of hip fracture showed similar thematic results including mobility and psychological  
43 effects (19). A similar study has also been completed exploring the patient experience of ankle  
44 reconstruction for ankle osteoarthritis (20) who discussed a central theme of vigilance of their  
45 affected ankle, which agrees with findings here in relation to individuals feeling aware or cautious of  
46 their ankle injury during recovery. Another article focussing on older women with vertebral fracture  
47 in Sweden also compares to results found here, showing the importance and strive for individuals to  
48 maintain independence when recovering from a fracture (21).  
49  
50  
51  
52  
53  
54  
55  
56  
57  
58  
59  
60



1  
2  
3 Results presented here enable a greater understanding of the lived experiences of individuals with  
4 this injury to allow for clinicians to better plan and implement appropriate patient centred  
5 management strategies. Further research should focus on the most effective weight bearing and  
6 rehabilitation protocols for this patient population. The results of this study will enable those  
7 involved in clinical research for interventions for ankle fracture to select the most appropriate  
8 patient centred outcome measures which assess items of most importance to patients.  
9  
10  
11  
12  
13

## 14 **ACKNOWLEDGEMENTS**

15  
16  
17 We would like to thank the participants of this study for giving up their time to speak to us about  
18 their experiences of their ankle fracture. We would also like to thank the AIR Trial Management  
19 Group, Karen Keates and Richard Grant and for their contribution to this study.  
20  
21  
22  
23

## 24 **AUTHOR'S CONTRIBUTIONS**

25  
26  
27 RM, RSK and DRE developed the protocol. RM completed the participant screening, recruitment,  
28 data collection and interview transcription. RM and ZHL completed the data analysis. RM, DRE, ZHL  
29 and RSK contributed to the final manuscript. All authors reviewed and approved the final  
30 manuscript.  
31  
32  
33  
34

## 35 **FUNDING**

36  
37  
38 Rebecca McKeown is funded by a National Institute for Health Research (NIHR) Career Development  
39 Fellowship for this research project. This publication presents independent research. The view  
40 expressed are those of the authors and not necessarily those of the NHS, the NIHR or the  
41 Department of Health and Social Care.  
42  
43  
44  
45

## 46 **COMPETING INTERESTS**

47  
48  
49 RM, DRE and ZHL confirm they have no conflicts of interest to declare. RSK is a NIHR Senior Fellow,  
50 current member of the UK NIHR HTA CET board and NIHR ICA Doctoral panel and former member of  
51 the NIHR RfPB board.  
52  
53  
54  
55

## 56 **SRQR CHECKLIST**

57  
58  
59 The SRQR Checklist is included as supplementary file 1.  
60



## DATA SHARING STATEMENT

No additional data are available.

## REFERENCES

1. Pasco JA, Sanders KM, Hoekstra FM, Henry MJ, Nicholson GC, Kotowicz MAJ. The human cost of fracture. *2005*;16(12):2046-52.
2. Court-Brown C, Caeser B. Epidemiology of adult fractures: A Review. *Injury*. 2006;37.
3. Lee KM, Chung CY, Kwon SS, Won SH, Lee SY, Chung MK, et al. Ankle fractures have features of an osteoporotic fracture. *Osteoporosis International*. 2013;24(11):2819-25.
4. Court-Brown CM, Duckworth AD, Clement ND, McQueen MM. Fractures in older adults. A view of the future? *Injury*. 2018;49(12):2161-6.
5. Burge RT, Worley D, Johansen A, Bhattacharyya S, Bose U. The cost of osteoporotic fractures in the UK: projections for 2000–2020. *Journal of Medical Economics*. 2001;4(1-4):51-62.
6. Costa M, Achten J, Griffin J, Petrou S, Pallister I, Lamb SE, et al. Effect of Locking Plate Fixation on 6-Month Disability Among Adults With Displaced Fracture of the Distal Tibia. The UK FixDT Randomized Clinical Trial. *JAMA*. 2017;318(18):1767-76.
7. Willett K, Keene DJ, Mistry D, Nam J, Tutton E, Handley R, et al. Close Contact Casting vs Surgery for Initial Treatment of Unstable Ankle Fractures in Older Adults: A Randomized Clinical Trial. *JAMA*. 2016;316(14):1455-63.
8. Dehghan N, McKee M, Jenkinson R, Schemitch E, Stas V, Nauth A, et al. Early Weightbearing and Range of Motion Versus Non-Weightbearing and Immobilization After Open Reduction and Internal Fixation of Unstable Ankle Fractures: A Randomized Controlled Trial. *Journal of Orthopaedic Trauma*. 2016;30(7).
9. Fernandez MA, Arnel L, Gould J, McGibbon A, Grant R, Bell P, et al. Research priorities in fragility fractures of the lower limb and pelvis: a UK priority setting partnership with the James Lind Alliance. *BMJ Open*. 2018;8(10):e023301.
10. McPhail S, Dunstan J, Canning J, Haines T. Life impact of ankle fractures: Qualitative analysis of patient and clinician experiences. *BMC Musculoskeletal Disorders*. 2012;13.
11. O'Brien BC, Harris IB, Beckman TJ, Reed DA, Cook DA. Standards for Reporting Qualitative Research: A Synthesis of Recommendations. 2014;89(9):1245-51.

- 1  
2  
3  
4 12. Braun V, Clarke V. What can "thematic analysis" offer health and wellbeing  
5 researchers? *Int J Qual Stud Health Well-being*. 2014;9:26152-.
- 6  
7 13. Liamputtong P. *Handbook of Research Methods in Health Social Sciences*.  
8 Singapore: Springer Nature; 2019.
- 9  
10 14. Kearney RS, McKeown R, Stevens S, Parsons N, Parsons H, Wells P, et al. Cast  
11 versus functional brace in the rehabilitation of patients treated for an ankle fracture: protocol  
12 for the UK study of ankle injury rehabilitation (AIR) multicentre randomised trial. *BMJ Open*.  
13 2018;8(12):e027242.
- 14  
15 15. Yilmaz K. Comparison of Quantitative and Qualitative Research Traditions:  
16 epistemological, theoretical, and methodological differences. *European Journal of Education*.  
17 2013;48.
- 18  
19 16. Lin CWC, Moseley AM, Refshauge KM. Effects of rehabilitation after ankle fracture: A  
20 cochrane systematic review: *European Journal of Physical and Rehabilitation Medicine*. 45  
21 (3) (pp 431-441), 2009. Date of Publication: September 2009.; 2009.
- 22  
23 17. Gill JR, Lostis E, Bleibleh SS, Hennessy MS, Thondickal F, Gadd RJ, et al. Weight-  
24 bearing in ankle fractures: An audit of UK practice. *The Foot*. 2019;39:28-36.
- 25  
26 18. Dehghan N, Mitchell SM, Schemitsch EH. Rehabilitation after plate fixation of upper  
27 and lower extremity fractures. *Injury*. 2018;49:S72-S7.
- 28  
29 19. Griffiths F, Mason V, Boardman F, Dennick K, Haywood K, Achten J, et al.  
30 Evaluating recovery following hip fracture: a qualitative interview study of what is important  
31 to patients. *BMJ Open*. 2015;5(1):e005406.
- 32  
33 20. Pinsker EB, Sale JEM, Gignac MAM, Daniels TR, Beaton DE. "I don't have to think  
34 about watching the ground": a qualitative study exploring the concept of vigilance as an  
35 important outcome for ankle reconstruction. *Arthritis Care & Research*. 2019;0(ja).
- 36  
37 21. Hallberg I, Ek A-C, Toss G, Bachrach-Lindström M. A striving for independence: a  
38 qualitative study of women living with vertebral fracture. *BMC Nursing*. 2010;9(1):7.
- 39  
40  
41  
42  
43  
44  
45  
46  
47  
48  
49  
50  
51  
52  
53  
54  
55  
56  
57  
58  
59  
60

8

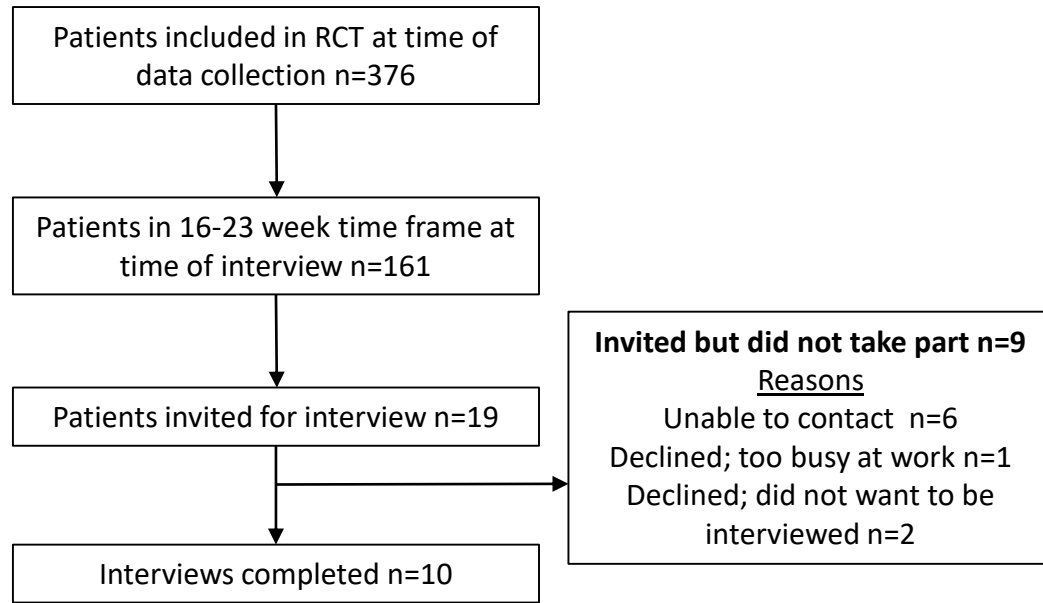

**Standards for Reporting Qualitative Research Checklist (SRQR)**

| Number                    | Topic                                       | Item                                                                                                                                                                                                                                                                                                                                          | Pages number/s |
|---------------------------|---------------------------------------------|-----------------------------------------------------------------------------------------------------------------------------------------------------------------------------------------------------------------------------------------------------------------------------------------------------------------------------------------------|----------------|
| <b>Title and Abstract</b> |                                             |                                                                                                                                                                                                                                                                                                                                               |                |
| S1                        | Title                                       | Concise description of the nature and topic of the study, identifying the study as qualitative or indicating the approach (e.g. ethnography, grounded theory) or data collection ,methods (e.g. interview, focus group) is recommended.                                                                                                       | 1              |
| S2                        | Abstract                                    | Summary of Key elements of the study using the abstract format of the intended publication; typically includes background, purpose, methods, results and conclusions.                                                                                                                                                                         | 1-2            |
| <b>Introduction</b>       |                                             |                                                                                                                                                                                                                                                                                                                                               |                |
| S3                        | Problem formulation                         | Description of significance of the problem/phenomenon studied; review of relevant theory and empirical work; problem statement.                                                                                                                                                                                                               | 3              |
| S4                        | Purpose or research questions               | Purpose of the study and specific objectives or questions                                                                                                                                                                                                                                                                                     | 3              |
| <b>Methods</b>            |                                             |                                                                                                                                                                                                                                                                                                                                               |                |
| S5                        | Qualitative approach and research paradigm  | Qualitative approach (e.g. ethnography, grounded theory, case study, phenomenology, narrative research) and guiding theory if appropriate; identifying the research paradigm (e.g. postpositivist, constructivist/interpretivist) is also recommended; rationale.                                                                             | 4              |
| S6                        | Researcher characteristics and reflectivity | Researchers' characteristics that may influence the research, including personal attributes, qualifications/experience, relationships with participants, assumption, and/or presuppositions; potential or actual interaction between researchers' characteristics and the research questions, approach, methods, results and/transferability. | 5              |
| S7                        | Context                                     | Setting/site and salient contextual factors; rationale.                                                                                                                                                                                                                                                                                       | 4-5            |

|                         |                                             |                                                                                                                                                                                                                                                                                        |      |
|-------------------------|---------------------------------------------|----------------------------------------------------------------------------------------------------------------------------------------------------------------------------------------------------------------------------------------------------------------------------------------|------|
| S8                      | Sampling strategy                           | How and why research participants, documents or events were selected; criteria for deciding when no further sampling was necessary (e.g. sampling saturation); rationale.                                                                                                              | 4    |
| S9                      | Ethical issues pertaining to human subjects | Documentation of approval by an appropriate ethics review board and participant consent, or explanation of lack thereof; other confidentiality and data security issues.                                                                                                               | 3, 5 |
| S10                     | Data collection methods                     | Types of data collected; details of data collection procedures including (as appropriate) start and stop dates of data collection and analysis; iterative process, triangulation of sources/methods, and modification of procedures in response to evolving study findings; rationale. | 5    |
| S11                     | Data collection instruments and techniques  | Description of instruments (e.g. interview guides, questionnaires) and devices (e.g. audio-recorders) used for data collection; if/how the instrument(s) changed over the course of the study.                                                                                         | 4-5  |
| S12                     | Units of study                              | Number and relevant characteristics of participants, documents, or events included in the study; level of participation (could be reported in results)                                                                                                                                 | 6-8  |
| S13                     | Data processing                             | Methods of processing data prior to and during analysis, including transcription, data entry, data management and security, verification of data integrity, data coding and anonymization/deidentification of excerpts.                                                                | 5-6  |
| S14                     | Data analysis                               | Process by which inferences, themes etc. were identified and developed, including researchers involved in the data analysis; usually references as specific paradigm or approach; rationale.                                                                                           | 5-6  |
| S15                     | Techniques to enhance trustworthiness       | Techniques to enhance trustworthiness and credibility of data analysis (e.g. member checking, audit trail, triangulation); rationale.                                                                                                                                                  | 5-6  |
| <b>Results/findings</b> |                                             |                                                                                                                                                                                                                                                                                        |      |
| S16                     | Synthesis and interpretation                | Main findings (e.g. interpretations, inferences, and themes); might include development of a theory or model, or integration with prior research or theory.                                                                                                                            | 9-16 |
| S17                     | Links to empirical data                     | Evidence (e.g. quotes, field notes, text excerpts, photographs) to substantiate analytic findings.                                                                                                                                                                                     | 9-16 |

| <b>Discussion</b> |                                                                                              |                                                                                                                                                                                                                                                                                                        |       |
|-------------------|----------------------------------------------------------------------------------------------|--------------------------------------------------------------------------------------------------------------------------------------------------------------------------------------------------------------------------------------------------------------------------------------------------------|-------|
| S18               | Integration with prior work. Implications, transferability, and contribution(s) to the field | Short summary of main findings; explanation of how findings and conclusions connect to, support, elaborate on, or challenge conclusions of earlier scholarship; discussion of scope of application/generalizability; identification of unique contribution(s) to scholarship in a discipline or field. | 16-17 |
| S19               | Limitations                                                                                  | Trustworthiness and limitations of findings.                                                                                                                                                                                                                                                           | 16-17 |
| <b>Other</b>      |                                                                                              |                                                                                                                                                                                                                                                                                                        |       |
| S20               | Conflicts of interest                                                                        | Potential sources of influence or perceived influence on study conduct and conclusions; how these were managed.                                                                                                                                                                                        | 17    |
| S21               | Funding                                                                                      | Sources of funding and other support; role of funders in data collection, interpretation and reporting.                                                                                                                                                                                                | 17    |

From O'Brien, B., Harris, I. and Beckman, T. et al. Standards for Reporting Qualitative Research: A Synthesis of Recommendations. *Academic Medicine*. 2014; 89: 1245-1251

# BMJ Open

## What are the patient experiences of an ankle fracture and the factors of most importance in their recovery? A qualitative interview study.

|                                 |                                                                                                                                                                                                                                                                                                 |
|---------------------------------|-------------------------------------------------------------------------------------------------------------------------------------------------------------------------------------------------------------------------------------------------------------------------------------------------|
| Journal:                        | <i>BMJ Open</i>                                                                                                                                                                                                                                                                                 |
| Manuscript ID                   | bmjopen-2019-033539.R2                                                                                                                                                                                                                                                                          |
| Article Type:                   | Original research                                                                                                                                                                                                                                                                               |
| Date Submitted by the Author:   | 11-Dec-2019                                                                                                                                                                                                                                                                                     |
| Complete List of Authors:       | McKeown, Rebecca; University of Warwick Warwick Medical School, Kearney, Rebecca; University of Warwick, Warwick Clinical Trials Unit Liew, Zi Heng; University of Warwick, Warwick Clinical Trials Unit, Warwick Medical School<br>Ellard, David; University of Warwick, Clinical Trials Unit; |
| <b>Primary Subject Heading</b>: | Qualitative research                                                                                                                                                                                                                                                                            |
| Secondary Subject Heading:      | Rehabilitation medicine, Patient-centred medicine                                                                                                                                                                                                                                               |
| Keywords:                       | Foot & ankle < ORTHOPAEDIC & TRAUMA SURGERY, QUALITATIVE RESEARCH, Ankle fractures, ankle injury, interviews, quality of life                                                                                                                                                                   |
|                                 |                                                                                                                                                                                                                                                                                                 |

SCHOLARONE™  
Manuscripts

1  
2  
3  
4  
5  
6  
7  
8  
9  
10  
11  
12  
13  
14  
15  
16  
17  
18  
19  
20  
21  
22  
23  
24  
25  
26  
27  
28  
29  
30  
31  
32  
33  
34  
35  
36  
37  
38  
39  
40  
41  
42  
43  
44  
45  
46  
47  
48  
49  
50  
51  
52  
53  
54  
55  
56  
57  
58  
59  
60

# What are the patient experiences of an ankle fracture and the factors of most importance in their recovery? A qualitative interview study.

## AUTHOR INFORMATION

R. McKeown (Corresponding Author) Warwick Clinical Trials Unit, Warwick Medical School, University of Warwick, Clinical Sciences Research Laboratories, University Hospitals Coventry and Warwickshire, CV2 2DX, UK. [r.mckeown.1@warwick.ac.uk](mailto:r.mckeown.1@warwick.ac.uk) 07969116187 ORCID: <https://orcid.org/0000-0002-3502-2328>

R.S. Kearney, Warwick Clinical Trials Unit, Warwick Medical School, University of Warwick, Clinical Sciences Research Laboratories, University Hospitals Coventry and Warwickshire, CV2 2DX, UK. [r.s.kearney@warwick.ac.uk](mailto:r.s.kearney@warwick.ac.uk)

Z.H. Liew, Warwick Clinical Trials Unit, Warwick Medical School, University of Warwick, Clinical Sciences Research Laboratories, University Hospitals Coventry and Warwickshire, CV2 2DX, UK. [zi.liew@warwick.ac.uk](mailto:zi.liew@warwick.ac.uk)

D.R. Ellard, Warwick Clinical Trials Unit, Warwick Medical School, University of Warwick, Clinical Sciences Research Laboratories, University Hospitals Coventry and Warwickshire, CV2 2DX, UK [d.r.ellard@warwick.ac.uk](mailto:d.r.ellard@warwick.ac.uk)

## WORD COUNT

5707 (excluding title page, abstract, references, figures and tables)



## ABSTRACT

### Objective

The objective of this qualitative research study is to explore the patient experiences of ankle fracture and the factors of most importance to them in recovery.

### Design

Semi-structured interviews exploring the patient experiences of ankle fracture recovery at 16-23 weeks following injury. Interviews followed a topic guide and were recorded with an encrypted audio recorder and then transcribed verbatim. Thematic content analysis was used to identify themes in the data.

### Setting

Individuals were recruited from a sample of participants of a UK-based clinical trial of immobilisation methods for ankle fracture. Interviews were conducted at the participants own homes or on a university campus setting.

### Participants

A purposive sample was used to account for key variables of age, gender and fracture management. Participants recruited from the clinical trial sample were adults aged 18 years or over with a closed ankle fracture.

### Results

Ten participants were interviewed, five of whom were female and six of whom had an operation for their ankle fracture. The age range of participants was 21-75 years with a mean of 51.6 years. Eight themes emerged from the data during analysis; mobility, loss of independence, healthcare, psychological effects, social and family life, ankle symptoms, sleep disturbance and fatigue and activities of daily living. Factors of importance to participants included regaining their independence, sleep quality and quantity, ability to drive, ability to walk without walking aids or weight bearing restrictions and radiological union.

## Conclusions

The results of this research demonstrates the extensive impact of ankle fracture on individuals' lives, including social and family life, sleep, their sense of independence and psychological wellbeing. The results of this study will enable an increased understanding of the factors of relevance to individuals with ankle fracture, allowing collection of appropriate outcomes in clinical studies for this condition. Ultimately these results will help to formulate appropriate patient centred rehabilitation plans for these patients.

## Keywords

Ankle fractures, ankle injury, interviews, qualitative research, quality of life, patient centred care.

## STRENGTHS AND LIMITATIONS OF THIS STUDY

- Use of well recognised reporting standards for purposes of transparency.
- Duplicate data analysis for consistency.
- Use of purposive sampling to account for key demographic variables.
- Participants were recruited from a clinical trial which restricted the timing of data collection.
- Participants who declined to take part in the trial or the interview may have had different experiences of recovery compared to those who agreed to participate.

## BACKGROUND

Ankle fractures are significant injuries which cause pain and reduced mobility (1). The injury demonstrates a bimodal distribution, usually affecting younger males and older females (2, 3). The incidence of ankle fracture is increasing and they contribute to the rising economic cost of managing fractures in the current ageing population (4). This cost of managing fractures in the UK is expected to reach £2.2 billion per annum by the year 2020 (5). Whilst several clinical effectiveness trials have been recently published to ascertain the optimal management strategies for individuals with fractures of the lower limbs (6-8), there is comparably less research into the patient experiences of recovering from these injuries. In 2018 a James Lind Alliance priority setting partnership on the subject of lower limb fractures in older people was completed and the sixth priority listed in this research area was "what is most important to adults in their recovery from a fragility fracture of the lower limb?" (9). This highlights the demand not only from academics and clinicians, but also patients and members of the public for further research in this area.

1  
2  
3 The life impact of ankle fractures has been previously assessed in an article including interviews of  
4 patients and clinicians in the context of outcome measure development (10). In this article we focus  
5 on patients only, with the aim of understanding their experience of ankle fracture recovery as well  
6 as the factors of most importance to them. This will enable a greater understanding of the patient  
7 experience of recovery from this injury, to ensure that domains of interest to participants are being  
8 collected in the trials to assess clinical effectiveness of interventions for this injury. Furthermore, this  
9 will enable clinicians to achieve a broader knowledge base of the experiences of individuals with this  
10 injury and enable appropriate and effective patient centred treatment plans to be formulated for  
11 these patients.  
12  
13  
14  
15  
16  
17  
18

## 19 **Objectives**

20  
21  
22 The objective of this qualitative study is to explore the patient experiences of ankle fracture and the  
23 factors of most importance to them during recovery.  
24  
25

## 26 **METHODS**

27  
28  
29 This research was conducted in accordance with the Standards for Reporting Qualitative Research  
30 (SRQR) checklist (11).  
31  
32  
33

### 34 **Ethical Approval**

35  
36  
37 Ethical approval was gained through substantial amendment to the Ankle Injury Rehabilitation (AIR)  
38 trial protocol (ISRCTN15537280) from the West Midlands Edgbaston NHS Research Ethics Committee  
39 on 07/09/2018 (reference: 17/WM/0239).  
40  
41  
42

### 43 **Study Design and Methodological Approach**

44  
45  
46 We completed semi-structured interviews with individuals who had sustained an ankle fracture at a  
47 single time point between 19 and 23 weeks following injury. The qualitative approach used here was  
48 the thematic content analysis to focus on the participants' experience of their injury (12). We took a  
49 realist approach to the analysis, acknowledging that the individuals' ankle injuries exist in a reality  
50 outside of their own perception of it (13).  
51  
52  
53  
54

### 55 **Participant Identification**

56  
57  
58 This study was embedded in the AIR trial, an ongoing randomised controlled trial comparing plaster  
59 cast to functional brace in the treatment of individuals with an ankle fracture (14). Participants of  
60

the trial were adults aged 18 years or over who had a closed ankle fracture either managed operatively or non-operatively. The eligibility criteria for the trial can be found in table 1.

| Inclusion criteria                                                                                                                                         | Exclusion Criteria                                                                                     |
|------------------------------------------------------------------------------------------------------------------------------------------------------------|--------------------------------------------------------------------------------------------------------|
| Able to give written informed consent                                                                                                                      | Ankle fracture secondary to known metastatic disease                                                   |
| Aged 18 years or over                                                                                                                                      | Complex intra-articular fracture (e.g. Pilon fracture)                                                 |
| A closed ankle fracture managed operatively or non-operatively for which the treating clinician would consider plaster cast a reasonable management option | In the opinion of the surgeon the patient would require manipulation and close contact/moulded casting |
| Randomised within 3 weeks of operative management or injury if non-operative                                                                               | Wound complications contraindicating functional brace intervention                                     |
|                                                                                                                                                            | Previous ankle fracture already randomised in the present trial                                        |
|                                                                                                                                                            | Known pre-existing neuropathic joint disease contraindicating functional brace intervention            |
|                                                                                                                                                            | Unable to adhere to trial procedures or complete postal questionnaires                                 |

Table 1 - Eligibility criteria of the AIR Trial

## Sampling

We used purposive sampling for this research study. Participants who had previously stated that they were willing to be contacted for further research into ankle fractures were considered for invitation to the study. Participants were approached after completion of the 16 week questionnaire in the trial follow up schedule as this was the primary outcome for the study. Interviews were completed after this time point to ensure that the interview did not influence the way in which participants answered the trial questionnaire. The sampling strategy allowed for a diverse range of patients with regards to their age, gender, fracture management (operative or non-operative) and allocated intervention within the trial (functional brace or plaster cast).

## Recruitment and Consent

The participants of the trial were screened for sampling attributes of age, gender, fracture management and randomised intervention. We screened the online database of trial participants for the four sampling attributes mentioned above and invited a diverse range of individuals in relation to these attributes to participate. Invitation letters and participant information sheets were sent out to these individuals and the letter stated that we would telephone them in one weeks' time to discuss the study. During the phone call, participants were given the opportunity to ask any questions. If they verbally consented to participate, a mutually convenient interview date and time was arranged between the interviewer and participant. At the interview consultation, the participant was given a further opportunity to ask questions. Once these had been answered satisfactorily they signed a consent form to confirm their willingness to participate. Participants were informed that they had the opportunity to withdraw their data at any time throughout the interview or up to 72 hours following the interview. We completed data analysis concurrently with the data collection so we could identify when no new themes were emerging from the data. We decided prior to commencing data collection and analysis that data collection would be stopped when we reached the point where two consecutive interviews were analysed with no new themes arising from the interviews. This occurred after eight interviews and we completed a further two interviews to be confident that no new themes were emerging. We felt confident that we had enough rich data for a robust analysis.

## Data Collection Process

The interviews were completed by the lead author (RM), a female physiotherapist currently working as an academic researcher towards completion of a PhD. The interviewer had no previous relationship with the participants and did not inform the participants of her background as a physiotherapist to avoid this influencing participant responses. Interviews were completed at a mutually agreeable time in the participants own homes or in university meeting rooms where this was not possible. A topic guide was produced and followed throughout each interview to ensure consistency between interviews. Examples of the questions asked can be found in Table 2. Field notes were taken throughout the data collection and analysis to maintain reflexivity during the project. Interviews were completed from 12/10/2018 to 03/04/2019 and continued until no new themes were emerging from the data.

| Example questions used in interviews                                         |
|------------------------------------------------------------------------------|
| Could you explain how your ankle fracture has impacted your day to day life? |

|    |                                                                                 |
|----|---------------------------------------------------------------------------------|
| 1  |                                                                                 |
| 2  |                                                                                 |
| 3  | How has your ankle fracture affected your walking?                              |
| 4  |                                                                                 |
| 5  | Could you talk to me about the impact of your ankle fracture on your family     |
| 6  | life?                                                                           |
| 7  |                                                                                 |
| 8  | Could you explain what was most important to you when recovering from           |
| 9  | your ankle fracture?                                                            |
| 10 |                                                                                 |
| 11 | What bothered you most throughout your recovery from your injury?               |
| 12 |                                                                                 |
| 13 | You mentioned that...was an important factor to you. Could you tell me more     |
| 14 | about that?                                                                     |
| 15 |                                                                                 |
| 16 | Did your ankle fracture affect your mood in any way?                            |
| 17 |                                                                                 |
| 18 | How did your ankle fracture affect your work?                                   |
| 19 |                                                                                 |
| 20 | How did your ankle fracture affect your leisure activities or use of free time? |
| 21 |                                                                                 |

Table 2: Example questions used during the interviews

## Data Analysis

Interviews were recorded with the use of an encrypted digital audio-recorder for which the lead researcher only had access to. Interview recordings were then downloaded to a secure server and were password protected only accessible to the lead researcher. The interviews were transcribed verbatim and all identifiable information were removed to ensure participant confidentiality. Interviews transcripts were stored on a secure server and pseudonymised by a unique study ID number. Once transcribed, interviews were uploaded to NVivo (NVivo12, QSR International) for analysis. We used thematic analysis to analyse the data. A second researcher (ZHL) duplicated the coding process in a sample of four of the interviews to ensure dependability and consistency in the analysis process (15). Transcripts were coded independently and then each interview transcript was discussed between the researchers to ensure agreement. Any sections of the transcripts which we did not agree on the coding for were discussed to reach consensus agreement on the most appropriate code to use in that section. We performed the analysis concurrently with the data collection and interviews were terminated when no new themes were emerging from the data.

## Patient and Public Involvement

Two patient and public involvement representatives from Warwick University User Teaching and Research Partnership were involved in the design and conduct of the randomised controlled trial provided consultation during protocol development. The representatives took an active role in reviewing and commenting on the interview study processes and associated burden of the study on participants. They provided consultation on the patient facing materials used in this qualitative

1  
2  
3 study, including the patient information sheet, invite letter and topic guide to ensure suitability.  
4  
5 Karen and Richard will be collaboratively involved in planning the dissemination of results to  
6  
7 participants alongside the results of the AIR trial when available.  
8  
9

## 10 RESULTS

11  
12 A total of 19 participants were invited to take part in this study. Nine declined participation and ten  
13  
14 participants were recruited and interviewed as part of this study. The participant recruitment  
15  
16 flowchart is found in figure 1 which shows the reasons for non-participation in the interview study.  
17  
18 The age range was 21-75 years with a mean of 51.6 years. After eight interviews, no new themes  
19  
20 emerged from the data and therefore we completed two more interviews to ensure no further  
21  
22 themes arose from the interviews, as per the conditions outlined in the methods. We terminated the  
23  
24 interviews at ten participants as there were no further themes in the remaining two transcripts.  
25  
26 Participant demographics and injury information are found in Table 3.

27 <<FIGURE 1 HERE>>  
28  
29  
30  
31  
32  
33  
34  
35  
36  
37  
38  
39  
40  
41  
42  
43  
44  
45  
46  
47  
48  
49  
50  
51  
52  
53  
54  
55  
56  
57  
58  
59  
60

| Participant ID | Time since injury   | Participant age (years) | Gender (M/F) | Fracture Management (Operative or non-operative) | Allocated Interventions | Any other injuries         | Mechanism of Injury                  | Occupation                      |
|----------------|---------------------|-------------------------|--------------|--------------------------------------------------|-------------------------|----------------------------|--------------------------------------|---------------------------------|
| 01             | 22 weeks            | 48                      | F            | Operative                                        | Functional Brace        | None                       | Low energy fall                      | Teacher                         |
| 02             | 22 weeks<br>6 days  | 59                      | M            | Operative                                        | Plaster Cast            | None                       | Low energy fall                      | Maintenance worker              |
| 03             | 21 weeks            | 75                      | F            | Non-operative                                    | Plaster Cast            | None                       | Low energy fall                      | Retired, volunteers for charity |
| 04             | 19 weeks,<br>1 day  | 37                      | M            | Non-operative                                    | Plaster Cast            | None                       | Low energy fall                      | University lecturer             |
| 05             | 21 weeks            | 29                      | F            | Operative                                        | Plaster Cast            | Contralateral ankle sprain | High energy fall doing gymnastics    | Nurse                           |
| 06             | 20 weeks,<br>4 days | 60                      | M            | Non-operative                                    | Functional Brace        | None                       | High energy fall whilst wakeboarding | Retired                         |



|    |                     |    |   |               |                     |                                      |                                                   |                               |
|----|---------------------|----|---|---------------|---------------------|--------------------------------------|---------------------------------------------------|-------------------------------|
| 07 | 21 weeks,<br>6 days | 73 | F | Operative     | Plaster Cast        | Ipsilateral<br>calcaneal<br>fracture | High energy<br>fall from loft<br>ladder           | Part time job<br>in a shop    |
| 08 | 21 weeks,<br>4 days | 45 | M | Non-operative | Functional<br>Brace | Contralateral<br>ankle sprain        | On a push<br>bike which<br>collided with<br>lorry | Works for car<br>manufacturer |
| 09 | 22 weeks,<br>3 days | 69 | F | Operative     | Functional<br>Brace | Wrist<br>fracture                    | Low energy<br>fall                                | Retired                       |
| 10 | 20 weeks,<br>2 days | 21 | M | Operative     | Functional<br>Brace | None                                 | High energy<br>fall from<br>moving<br>vehicle     | Undergraduate<br>Student      |

Table 3: Participant demographics and injury information.

1  
2  
3 During analysis, eight themes emerged from the data; mobility, loss of independence, healthcare,  
4 ankle symptoms, sleep disturbance and fatigue, family and social life, psychological effects, and  
5 activities of daily living.  
6  
7

## 8 9 **Mobility**

10  
11  
12 Participants described their difficulty in walking “normally” and getting around, usually describing  
13 this as frustrating or inconvenient. Many spoke about their reduced mobility in the context of their  
14 weight bearing restrictions and walking aids, which were usually discussed inextricably. The  
15 frustration caused by walking aids and weight bearing restrictions were especially evident in the  
16 older participants of the study, many of whom described this as the most difficult part of their  
17 fracture for them. Several individuals explained that the weight bearing restrictions were too  
18 difficult to adhere to and described how they were not following the weight bearing restrictions  
19 advised by their clinician for this reason. Individuals described using walking aids as slow and hard-  
20 work, requiring frequent rests and some noted their frustration with the sudden inability to carry  
21 things. However, people also spoke of their walking aids as a necessary inconvenience,  
22 acknowledging that they were essential during periods of weight bearing restrictions. Older  
23 participants discussed a fear of falling, usually when leaving the house or out in busy public places.  
24 Some described the difficulty in not being able to drive, explaining how that was an important factor  
25 in their recovery for them.  
26  
27

28  
29  
30 Pt09: *“Just stuck here...I felt like a prisoner in my own home I think for the first four weeks...”*

31  
32 Pt07: *“I used to dream of walking [the dog] down the park. Yeah...I would be...you know...dream  
33 about it. Erm [pause] just...just to be on two feet that was my sort of you know [pleading] ‘please let  
34 me get onto two feet’”*

35  
36 Pt03: *“Yes because you know I thought crutches were easy things to use. But as I say to have to hop  
37 at my age is a very hard thing to do...”*

38  
39 Pt10: *“You couldn’t go more than a hundred...two hundred metres without stopping because it just  
40 puts so much pressure on your hands.”*

41  
42 Pt01: *“the worst was when I wasn’t able to drive; once I was able to drive again I think that was a  
43 turning point.”*  
44  
45  
46  
47  
48  
49  
50  
51  
52  
53  
54  
55  
56  
57  
58  
59  
60

## Loss of Independence

A loss of independence and subsequent reliance on others was spoken about by all participants, which was required for household tasks, care of dependents or transport. For some this was a significant source of frustration. Some individuals identified the need to rely on others as a cause of low mood and described how the ability to regain independence was of vital importance for their mental wellbeing. For others, the need to rely on others was less bothersome and something they described as adjusting to. Some individuals described how the need to rely on others caused tensions within the relationships. Despite needing to rely on others for some things, people also described adapting the way they did things in order to retain their independence as much as possible.

Pt01: *"I think that's the thing that got me down the most having to rely on others to come and take you out and you know which...which people were absolutely brilliant but I'm quite independent and...and I...that was hard"*

Pt09: *"...for mental reasons it's good to get back to normal erm that was quite important for me to feel as though I was able to take charge of my own life again. Erm yeah rather than relying on other people."*

Pt10: *"I dunno you just get a bit claustrophobic everyone doing everything for you."*

Pt05: *"The worst part was not being able to do things when I wanted how I wanted that was the worst definitely."*

Pt05: *"He was having to do everything and I would sit and stare at the washing up and I couldn't do it and it was so frustrating because I like a clean house."*

## Ankle Symptoms

Individuals spoke of troublesome symptoms around their ankle to varying degrees, including pain, skin changes, wound issues, swelling, reduced movement and loss of strength and muscle bulk. Whilst many individuals felt it was important to not be in pain, many described their pain as manageable and controllable, which didn't prevent them from performing functionally. Skin changes including dry skin around the ankle were noted, particularly by those participants who received a plaster cast. One individual became very concerned with the development of pressure sore from the plaster cast which kept them awake at night. Several people discussed the swelling in their foot and ankle, often attributing this to a difficulty in finding suitable footwear. Almost all participants

1  
2  
3 interviewed described a heightened awareness of their ankle, especially when discussing being out  
4 in public spaces, walking on uneven surfaces or returning to physical activity.  
5

6  
7 Pt06: *"I still carried on. I mean really it was not...on a scale of one to ten...it was never more than a*  
8 *sort of four or a five to be honest."*  
9

10  
11 Pt01: *"...and like I say of an evening if I...to come in from work not feel that it's swollen and not feel*  
12 *that it's uncomfortable erm then I think that perhaps that would be a hundred percent recovery."*  
13

14  
15 Pt05: *"Err that...the first time I think I was really concerned about the heel I was convinced it was*  
16 *numb because the cast was too tight and the fact that I couldn't look at it...I couldn't get to it...I*  
17 *couldn't see it. Errm I was convinced absolutely convinced that I was getting all sorts of you know*  
18 *pressure sores...blisters."*  
19

20  
21 Pt09: *"I've got very good flexibility in my ankle but not much strength. So that's what I'm working*  
22 *on."*  
23

## 24 25 26 27 **Sleep Disturbance and Fatigue**

28  
29 Participants described disturbed sleep and increased fatigue in their recovery period from the ankle  
30 fracture. Individuals described difficulty getting to sleep or waking during the night due to pain.  
31 Those who had a plaster cast described a difficulty in getting comfortable at night because of this.  
32 Some described a general increase in fatigue because of the increased effort that walking took.  
33 Many spoke about sleep in the context of their medication, with some individuals using pain  
34 medication to aid with sleep. Others described how the sleep issues and subsequent tiredness  
35 affected their performance at work. Some felt that the effect on sleep was one of the more  
36 important factors in their ankle fracture recovery.  
37

38  
39 Pt04: *"Erm I think the loss of sleep was the worst. Yeah...it wasn't it wasn't even so much the pain*  
40 *itself as the fact that I wasn't sleeping properly and I was tired all the time for a few weeks I think*  
41 *that was the worst."*  
42

43  
44 Pt02: *"I think it stopped me from...yeah I think it stopped me from sleeping so much. I just couldn't*  
45 *get it comfortable at all... it's when it was in the cast was the main thing, getting it comfortable in*  
46 *the cast."*  
47

## 48 49 50 51 52 **Psychological Effects**

53  
54 Psychological effects were discussed to varying degrees between participants in this study. Many  
55 described their difficulty moving around and need to rely on others as causing feelings of frustration  
56  
57  
58  
59  
60

1  
2  
3 and this was a commonly described emotion. Some described feelings of depression and low mood  
4 attributed to their injury and limitations it caused. One individual described an emotional lability  
5 during their recovery period, explaining how they would cry a lot more readily than usual  
6 throughout the recovery. Several people described an anxiety regarding the long term function of  
7 their ankle. Younger participants particularly described this anxiety when discussing valued activities  
8 such as sports and leisure. The older participants were more concerned with getting back to usual  
9 function in terms of walking and driving, explaining their hopes of regaining their pre-fracture level  
10 of independence. There were some individuals who did not report any mood changes as a result of  
11 their fracture. Some individuals reported issues with body image and voiced concerns regarding  
12 their inability to exercise and the impact that might have on their weight. Others spoke of their  
13 injury and associated limitations in relation to feeling old or referencing the ageing process when  
14 discussing their recovery.  
15  
16  
17  
18  
19  
20  
21  
22

23  
24 Pt09: *"Yeah. Tearful. Yeah. Not so much when I was out 'cos you don't do that. But yeah. It's just a*  
25 *horrible feeling...just...I don't...it's so difficult to be able to pin point exactly what it is that actually*  
26 *brings the tears on. I was low...very low."*  
27  
28

29  
30 Pt03: *"Yeah but it did make me depressed at times yeah."*  
31

32 Pt05: *"Any anxieties I had at that time were around long term recovery. I mean I probably could have*  
33 *been happier but I wouldn't have gone so far as to say I was actually depressed."*  
34  
35

36 Pt08: *"I was anxious...Yeah but it's just it...well it's alright now but at the time I remember thinking...I*  
37 *was...I was quite frightened 'cos it was really painful."*  
38  
39

40 Pt05: *"...and that is so important to me to be able to get back to that...to be fit you know so I'm quite*  
41 *weight conscious. I'm very conscious of the fact that I don't want to get fat sitting around and not*  
42 *doing anything."*  
43  
44

45 Pt03: *"Errm one of these elderly people's push about things in the house [pause] and I just get it into*  
46 *my mind that I'm not old enough for one of them yet [laughs] so that was very disheartening yeah to*  
47 *use that."*  
48  
49  
50

## 51 **Activities of Daily Living**

52

53  
54 Participants described their difficulty or inability to complete their activities of daily living, such as  
55 personal care, household tasks, work and leisure activities. When discussing personal care and  
56 washing and dressing, many people spoke of finding new routines and adapting to new ways of  
57 doing things. Individuals discussed these in relation to their walking aids and weight bearing status,  
58  
59  
60

1  
2  
3 stating that these factors meant that the process of washing and dressing took much longer. Those  
4 who received the functional brace spoke of the benefit of removing the brace for washing. Those  
5 who received a plaster cast discussed the need to use a cast cover for washing. Some female  
6 participants spoke of the frustration of not being able to shave their leg due to the irremovable cast.  
7  
8

9  
10 Pt09: *"...fortunately they could take me to the toilet on a like a wheelie commode thing which sort of*  
11 *slots over the toilet so that wasn't too bad in that respect but it's still...[sighs] it's something we don't*  
12 *like I suppose isn't it? You know the personal things...going to the toilet...washing...somebody had to*  
13 *shower me but you know I...I was OK."*  
14  
15

16  
17 Pt04: *"Getting in the shower was a pain...I'm kind of hopping over a slippery floor in the shower erm*  
18 *with a weird pose to make sure I'm not putting too much weight on my leg. Erm so it took much*  
19 *longer to shower."*  
20  
21

22  
23 Pt05: *"I wanted to shave my leg...I wanted to wash it properly...the first thing I did when I got home I*  
24 *took it off had a shower shaved my leg it was disgusting. My other half nearly divorced me over the*  
25 *state of my leg! [laughs]"*  
26  
27

28  
29 Household tasks were severely restricted by participant's injuries and many spoke of these in the  
30 context of their walking aids, as they did not have hands free to carry things. Many spoke of relying  
31 on others for completion of essential tasks such as meal preparation and grocery shopping. Some  
32 spoke of adaption in doing things such as housework by getting on their hands and knees to  
33 complete tasks. Many people described how others took on the majority of the house work and  
34 caring for any dependents. Some people found a source of frustration in the standards of the other  
35 person completing the housework, which did not match their own personal standards.  
36  
37

38  
39 Pt10: *"I remember the most frustrating thing...it was just the little things just having a big bag of*  
40 *washing on the top floor and I couldn't put it on the handle of the crutch and peg it down so I had to*  
41 *call someone up and they had to come and cart it down for me."*  
42  
43

44  
45 Pt05: *"Yeah well I was lucky my wife basically took over everything." We try and share most things*  
46 *and I was...I was totally just not contributing at all so I mean as typical evening routine now I would*  
47 *help get the kids to bed I would help bath them I'd help give them dinner and whilst she's getting the*  
48 *baby to sleep I'd do the washing up and Hoover and erm pack the bags for tomorrow things like that*  
49 *so for a few weeks that almost went out the window."*  
50  
51

52  
53 Pt07: *"Erm yes I discovered that if I got on my knees...hands and knees [pause] I could actually...not*  
54 *Hoover...but I could get a stick brush and sweep the carpet. Erm I did that for quite a while. And then*  
55 *you had to make sure that you were near something so that I could get back up again. I also did*  
56  
57  
58  
59  
60

1  
2  
3 *gardening on my hands and knees because it was...to see it just going...it was heart-breaking. And I*  
4 *thought 'right if I could get out there I'm sure if I'd got something to kneel on I can actually do that'*  
5 *and I did."*  
6  
7

8  
9 In terms of leisure time, many people were restricted from participating in their usual leisure  
10 activities due to their injury and used this free time for more sedentary activities instead. For some  
11 this was acceptable but this was a source of frustration for others, who described a dislike for  
12 "sitting around". Those who were normally physically active discussed their anxieties with returning  
13 to these activities and discussed feelings of caution and heightened awareness in their ankle  
14 associated with their return to sports and exercise. Those with more sedentary hobbies reported  
15 little or no impact on these. Several people spoke of having to miss holidays due to their injury. For  
16 those who worked, many people spoke of needing to reduce working hours or be off work due to  
17 their injury. Those who were able to work from home discussed doing so throughout the recovery  
18 period. Some discussed the financial implications of not working, which was a concern for some.  
19  
20  
21  
22  
23  
24  
25

26 Pt06: *"Errm errrm but apart from that it was obviously a massive limitation on doing all the sport I*  
27 *like to do. Errm so that was....it sort of drove me a bit mad."*  
28  
29

30 Pt09: *"...you know when you've got the opportunity maybe to sit and watch television all day or read*  
31 *all day or whatever but you don't...mentally you don't feel like doing that either?"*  
32  
33

34 Pt07: *"I mean I do sewing...I make bags and that...well of course I just hadn't got the strength in that*  
35 *foot to press the pedal down on the machine [pause] so I couldn't do...yeah anything like that."*  
36  
37  
38

## 39 **Family and Social Life**

40  
41 Many individuals discussed the impact that their ankle fracture had on their usual social and family  
42 life. The majority of individuals described how they were unable to go out independently to meet  
43 others and instead people would come to visit them. Some described a reduction in alcohol  
44 consumption because of this and additionally due to the pain medication they were taking. Some  
45 described how their social life improved as they saw family more as they were always checking in to  
46 help them. Some individuals described how their low mood meant they didn't feel up to socialising  
47 as much as usual. In terms of family life, many of the participants spoke of a need to adapt usual  
48 roles and responsibilities in light of their injury. A few individuals mentioned the tensions this could  
49 sometimes cause in their relationships with others. The impact on the family and family activities  
50 were also discussed, such as adapting childcare responsibilities and activities usually done as a  
51 family. Several individuals took time to explain their concern with the strain and pressure this put on  
52 other members of the household or wider family, who were taking on more workload than usual.  
53  
54  
55  
56  
57  
58  
59  
60



1  
2  
3 Those with childcare responsibilities spoke of the psychological impact of not being able to perform  
4 the role they would usually perform for their children.  
5

6  
7 Pt09: *"I was totally reliant either on [husband] or on friends to pick me up...take me out but again  
8 you don't feel like doing the things. Erm people would say 'Ooh you know come and do this.' And you  
9 think 'Oh I don't want to be out in company' but we did I mean we forced ourselves to. Erm so yes it  
10 did impact on it but only probably because we allowed it to in the sense that we didn't want to go  
11 anywhere."*  
12  
13

14  
15 Pt01: *"I suppose the most frustrating thing for me really was that erm [name of child] my eldest was  
16 doing his A-Levels and so I was unable to take him backwards and forwards because, he was...he was  
17 at [school name], I was unable to drive him to his exams so my dad he was brilliant he stepped in  
18 but...just little things like that it just makes you feel a little bit [pause]...you....psychologically you feel  
19 like you're not able to perform the role that you normally perform sort of thing so..."*  
20  
21  
22

23  
24 Pt 05: *"Having to spend so much time with my mum that we started to grate on each other's nerves  
25 after a while and in the end you just think 'I'd rather just stay indoors than have to go round and  
26 have another argument with mum because I've seen her every day for the last two weeks'."*  
27  
28  
29

## 30 31 Healthcare

32  
33 Individuals discussed their experiences of the healthcare they received for their ankle fracture.  
34 Many of the participants praised the services provided and staff providing them during their  
35 recovery period. Those who required an inpatient stay for their injury described these experiences  
36 as lonely or difficult, usually due to other patients in the ward with them. Fracture clinic experiences  
37 were generally positive, with some individuals expressing confusion about seeing a different clinician  
38 to the one who performed their fracture fixation operation. Those who received physiotherapy  
39 generally recounted this as a useful experience, describing it as solution focussed and helpful in  
40 providing education and reassurance about their injury. Others described physiotherapy as slow and  
41 hard work. Those who were not offered physiotherapy explained how they felt they would have  
42 benefitted from it or felt they still needed some physiotherapy intervention. For one individual,  
43 when asked about the factors of most importance to them, they responded that the radiographic  
44 outcome was important and being able to see that the bone had healed on the radiographs was the  
45 most important factor to them in their recovery.  
46  
47  
48  
49  
50  
51  
52  
53  
54  
55

56 Pt02: *"Well when they took the cast off the only thing that did concern me; I didn't have the same  
57 surgeon looking at it. I was expecting the same one as he did it just to say it was ok but erm I thought  
58  
59  
60*



1  
2  
3 *that was pretty strange. Usually you get the same surgeon all the way through the same doctor all*  
4 *the way through.”*  
5  
6

7 Pt01: *“She [physiotherapist] was absolutely brilliant really, really good and I think that just helped as*  
8 *well just having somebody you know showing you the things you could do but also say... you could*  
9 *just give you the confidence that yes you are fine to walk on it it’s not going to [pause] do anything or*  
10 *whatever so that...I think...I think the physio is really important.”*  
11  
12  
13

14 Pt10: *“No that’s the only thing really they never offered me physio. Erm whether they felt I didn’t*  
15 *need it or anything I’m not sure. Or whether that’s something you have to pursue privately I don’t*  
16 *know. But no they never really offered it or spoke about it... but my Mum said ‘you should probably*  
17 *get some’ but I just never really followed it up.”*  
18  
19  
20

21 Pt08: *“Oh seeing the radiographs ‘cos I wanted to see the bone...solid again. And every time I kept*  
22 *going back and just seeing the gap...that was the target I wanted to see a radiograph that looked like*  
23 *it didn’t have a split down the bone. But that was the initial thought it was like let’s see the*  
24 *radiographs...when that crack’s gone I’m...I’m well again”*  
25  
26  
27  
28  
29

## 30 DISCUSSION

31  
32  
33 The results of this qualitative study shows that individuals experience a wide range of concerns  
34 related to their ankle fracture, including the usual symptoms of pain and reduced mobility.  
35 Individuals also described effects on psychological wellbeing, sleep, their sense of independence and  
36 family and social life. The factors of most importance discussed by the participants here ranged from  
37 regaining independence, improving sleep quality and quantity, ability to drive or get out and about,  
38 no longer requiring the use of walking aids or needing to follow weight bearing restrictions. Some  
39 were also concerned with the radiographic outcome during their recovery. There was variations in  
40 experience in relation to the age of participants; older individuals described a more intense difficulty  
41 in adhering to weight bearing restrictions, coping with the loss of independence and reported more  
42 severe psychological effects than the younger individuals interviewed here.  
43  
44  
45  
46  
47  
48  
49

50 Considering the significant difficulty that older individuals face in tolerating weight bearing  
51 restrictions there is a need for further research into the most appropriate weight bearing protocols  
52 for ankle fractures, which is unclear and there is evidence of inconsistency in clinical practice (16-18).  
53 In some cases, weight bearing may provide more benefits than harm and further evaluation of these  
54 protocols are warranted. In instances where weight bearing restrictions are deemed essential,  
55 consideration of alternative or innovative walking aids would be helpful to ensure restrictions are  
56  
57  
58  
59  
60

1  
2  
3 able to be adhered to. The provision of physiotherapy between participants was inconsistent and  
4 the evidence for rehabilitation protocols following ankle fracture are similarly unclear in the  
5 literature (16). Research to identify the most effective physiotherapy interventions, for which  
6 patients and during what time frame is warranted to standardise care. The prevalence of  
7 psychological effects such as anxiety and depression reported in this study indicates that a more  
8 holistic approach to intervention is required following trauma. Furthermore, the importance of  
9 returning to driving is key for some patients and there is often a lack of definitive guidance given to  
10 patients regarding this (19).

11  
12  
13  
14  
15  
16  
17 This study compares to another qualitative study completed with those with ankle fracture (10) who  
18 also demonstrated wide ranging effects on individuals with ankle fracture, including social and  
19 psychological impacts as well as activities of daily living. There were some differences of this study,  
20 in that here we focussed only on patients with an ankle fracture, whereas the previous research also  
21 interviewed clinicians. This article adds the concepts and factors of most importance to individuals'  
22 with an ankle fracture, contributing further to this research area. Other research into patient  
23 experience of hip fracture showed similar thematic results including mobility and psychological  
24 effects (20). A similar study has also been completed exploring the patient experience of ankle  
25 reconstruction for ankle osteoarthritis (21) who discussed a central theme of vigilance of their  
26 affected ankle, which agrees with findings here in relation to individuals feeling aware or cautious of  
27 their ankle injury during recovery. Another article focussing on older women with vertebral fracture  
28 in Sweden also compares to results found here, showing the importance and strive for individuals to  
29 maintain independence when recovering from a fracture (22).

30  
31  
32  
33  
34  
35  
36  
37  
38  
39  
40 The strengths of this study include the exploration of a burdensome condition which is increasing in  
41 prevalence. Exploring the factors of most importance to individuals with ankle fracture in such a  
42 widely studied injury is important in ensuring we are collecting relevant and important outcomes for  
43 individuals with this injury, as well as providing clinical care which is sensitive to issues most  
44 pertinent to them. We used a purposive sample to interview a representative sample of the  
45 population of adults with ankle fractures and duplicated the data analysis for purposes of  
46 consistency. A weakness of this study is that the timing of the interviews were limited by the primary  
47 outcome time point of the trial. If this was not a constraint, it would have been beneficial to  
48 interview at regular time periods from time of injury to ensure that participants could be  
49 interviewed throughout recovery period, rather than requiring the participants to recall information  
50 from their whole recovery experience. Furthermore, there were nine individuals who were invited  
51 but did not take part, three of whom declined to be interviewed. There is a possibility that these  
52 individuals might differ significantly from those who agreed to participate, for example, have had

1  
2  
3 more difficulty throughout their recovery than others. Finally, the lead researcher (RM) and second  
4 coder (ZHL) are both physiotherapists by background. Whilst every effort was made to ensure  
5 researcher reflexivity and reduce bias throughout the process of the study, as with all qualitative  
6 enquiry, the researchers' professional background and personal experiences will likely have  
7 introduced bias throughout the collection, analysis and interpretation of data.  
8  
9  
10  
11

## 12 **Conclusion**

13  
14  
15 Results presented here enable a greater understanding of the lived experiences of individuals with  
16 this injury to allow for clinicians to better plan and implement appropriate patient centred  
17 management strategies. Results of this research show that individuals with ankle fracture experience  
18 issues with not only mobility and pain, but also with adhering to weight-bearing restrictions,  
19 psychological effects and a profound impact on their sense of independence. Further research  
20 should focus on the most effective weight bearing and rehabilitation protocols for this patient  
21 population, which are currently inconsistent in clinical practice. Furthermore, the results here  
22 suggest that older patients experience these effects more severely than younger individuals. The  
23 results of this study will enable those involved in clinical research for interventions for ankle fracture  
24 to select the most appropriate patient centred outcome measures which assess items of most  
25 importance to patients.  
26  
27  
28  
29  
30  
31  
32  
33  
34

## 35 **ACKNOWLEDGEMENTS**

36  
37  
38 We would like to thank the participants of this study for giving up their time to speak to us about  
39 their experiences of their ankle fractures. Thank you to the Patient and Public Involvement  
40 Representative, Karen Keates and Richard Grant for their contribution to this study. Finally, thank  
41 you to the AIR Trial Management Group for their guidance throughout this study.  
42  
43  
44  
45

## 46 **AUTHOR'S CONTRIBUTIONS**

47  
48  
49 RM, RSK and DRE developed the protocol. RM completed the participant screening, recruitment,  
50 data collection and interview transcription. RM and ZHL completed the data analysis. RM, DRE, ZHL  
51 and RSK contributed to the final manuscript. All authors reviewed and approved the final  
52 manuscript.  
53  
54  
55  
56  
57  
58  
59  
60

## FUNDING

Rebecca McKeown is funded by a National Institute for Health Research (NIHR) Career Development Fellowship for this research project. This publication presents independent research. The view expressed are those of the authors and not necessarily those of the NHS, the NIHR or the Department of Health and Social Care.

## COMPETING INTERESTS

RM, DRE and ZHL confirm they have no conflicts of interest to declare. RSK is a NIHR Senior Fellow, current member of the UK NIHR HTA CET board and NIHR ICA Doctoral panel and former member of the NIHR RfPB board.

## DATA SHARING STATEMENT

No additional data are available.

## REFERENCES

1. Pasco JA, Sanders KM, Hoekstra FM, Henry MJ, Nicholson GC, Kotowicz MAJOI. The human cost of fracture. 2005;16(12):2046-52.
2. Court-Brown C, Caeser B. Epidemiology of adult fractures: A Review. Injury. 2006;37.
3. Lee KM, Chung CY, Kwon SS, Won SH, Lee SY, Chung MK, et al. Ankle fractures have features of an osteoporotic fracture. Osteoporosis International. 2013;24(11):2819-25.
4. Court-Brown CM, Duckworth AD, Clement ND, McQueen MM. Fractures in older adults. A view of the future? Injury. 2018;49(12):2161-6.
5. Burge RT, Worley D, Johansen A, Bhattacharyya S, Bose U. The cost of osteoporotic fractures in the UK: projections for 2000–2020. Journal of Medical Economics. 2001;4(1-4):51-62.
6. Costa M, Achten J, Griffin J, Petrou S, Pallister I, Lamb SE, et al. Effect of Locking Plate Fixation on 6-Month Disability Among Adults With Displaced Fracture of the Distal Tibia. The UK FixDT Randomized Clinical Trial. JAMA. 2017;318(18):1767-76.
7. Willett K, Keene DJ, Mistry D, Nam J, Tutton E, Handley R, et al. Close Contact Casting vs Surgery for Initial Treatment of Unstable Ankle Fractures in Older Adults: A Randomized Clinical Trial. JAMA. 2016;316(14):1455-63.

- 1  
2  
3  
4 8. Dehghan N, McKee M, Jenkinson R, Schemitch E, Stas V, Nauth A, et al. Early  
5 Weightbearing and Range of Motion Versus Non-Weightbearing and Immobilization After  
6 Open Reduction and Internal Fixation of Unstable Ankle Fractures: A Randomized  
7 Controlled Trial. *Journal of Orthopaedic Trauma*. 2016;30(7).
- 8  
9  
10 9. Fernandez MA, Arnel L, Gould J, McGibbon A, Grant R, Bell P, et al. Research  
11 priorities in fragility fractures of the lower limb and pelvis: a UK priority setting partnership  
12 with the James Lind Alliance. *BMJ Open*. 2018;8(10):e023301.
- 13  
14 10. McPhail S, Dunstan J, Canning J, Haines T. Life impact of ankle fractures:  
15 Qualitative analysis of patient and clinician experiences. *BMC Musculoskeletal Disorders*.  
16 2012;13.
- 17  
18 11. O'Brien BC, Harris IB, Beckman TJ, Reed DA, Cook DA. Standards for Reporting  
19 Qualitative Research: A Synthesis of Recommendations. 2014;89(9):1245-51.
- 20  
21 12. Braun V, Clarke V. What can "thematic analysis" offer health and wellbeing  
22 researchers? *Int J Qual Stud Health Well-being*. 2014;9:26152-.
- 23  
24 13. Liamputtong P. *Handbook of Research Methods in Health Social Sciences*.  
25 Singapore: Springer Nature; 2019.
- 26  
27 14. Kearney RS, McKeown R, Stevens S, Parsons N, Parsons H, Wells P, et al. Cast  
28 versus functional brace in the rehabilitation of patients treated for an ankle fracture: protocol  
29 for the UK study of ankle injury rehabilitation (AIR) multicentre randomised trial. *BMJ Open*.  
30 2018;8(12):e027242.
- 31  
32 15. Yilmaz K. Comparison of Quantitative and Qualitative Research Traditions:  
33 epistemological, theoretical, and methodological differences. *European Journal of Education*.  
34 2013;48.
- 35  
36 16. Lin CWC, Moseley AM, Refshauge KM. Effects of rehabilitation after ankle fracture: A  
37 cochrane systematic review: *European Journal of Physical and Rehabilitation Medicine*. 45  
38 (3) (pp 431-441), 2009. Date of Publication: September 2009.; 2009.
- 39  
40 17. Gill JR, Lostis E, Bleibleh SS, Hennessy MS, Thondickal F, Gadd RJ, et al. Weight-  
41 bearing in ankle fractures: An audit of UK practice. *The Foot*. 2019;39:28-36.
- 42  
43 18. Dehghan N, Mitchell SM, Schemitsch EH. Rehabilitation after plate fixation of upper  
44 and lower extremity fractures. *Injury*. 2018;49:S72-S7.
- 45  
46 19. Ho SWL, Yam M, Chan ML, Kwek EBK. Return to car driving is safe 6 weeks after  
47 operative treatment of right ankle fractures. *Archives of Orthopaedic and Trauma Surgery*.  
48 2018;138(12):1691-7.
- 49  
50 20. Griffiths F, Mason V, Boardman F, Dennick K, Haywood K, Achten J, et al.  
51 Evaluating recovery following hip fracture: a qualitative interview study of what is important  
52 to patients. *BMJ Open*. 2015;5(1):e005406.
- 53  
54  
55  
56  
57  
58  
59  
60

- 1  
2  
3  
4 21. Pinsker EB, Sale JEM, Gignac MAM, Daniels TR, Beaton DE. "I don't have to think  
5 about watching the ground": a qualitative study exploring the concept of vigilance as an  
6 important outcome for ankle reconstruction. *Arthritis Care & Research*. 2019;0(ja).  
7  
8 22. Hallberg I, Ek A-C, Toss G, Bachrach-Lindström M. A striving for independence: a  
9 qualitative study of women living with vertebral fracture. *BMC Nursing*. 2010;9(1):7.  
10  
11  
12  
13

14 FIGURE CAPTION

15  
16 Figure 1 – Participant recruitment flow chart  
17  
18  
19  
20  
21  
22  
23  
24  
25  
26  
27  
28  
29  
30  
31  
32  
33  
34  
35  
36  
37  
38  
39  
40  
41  
42  
43  
44  
45  
46  
47  
48  
49  
50  
51  
52  
53  
54  
55  
56  
57  
58  
59  
60

For peer review only

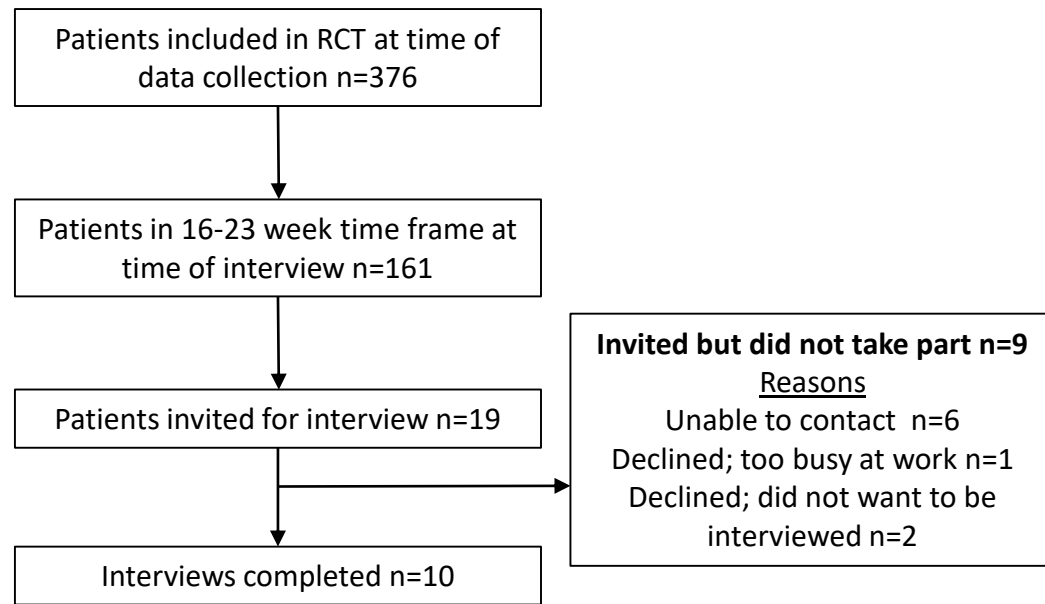

**Standards for Reporting Qualitative Research Checklist (SRQR)**

| Number                    | Topic                                       | Item                                                                                                                                                                                                                                                                                                                                          | Pages number/s |
|---------------------------|---------------------------------------------|-----------------------------------------------------------------------------------------------------------------------------------------------------------------------------------------------------------------------------------------------------------------------------------------------------------------------------------------------|----------------|
| <b>Title and Abstract</b> |                                             |                                                                                                                                                                                                                                                                                                                                               |                |
| S1                        | Title                                       | Concise description of the nature and topic of the study, identifying the study as qualitative or indicating the approach (e.g. ethnography, grounded theory) or data collection ,methods (e.g. interview, focus group) is recommended.                                                                                                       | 1              |
| S2                        | Abstract                                    | Summary of Key elements of the study using the abstract format of the intended publication; typically includes background, purpose, methods, results and conclusions.                                                                                                                                                                         | 1-2            |
| <b>Introduction</b>       |                                             |                                                                                                                                                                                                                                                                                                                                               |                |
| S3                        | Problem formulation                         | Description of significance of the problem/phenomenon studied; review of relevant theory and empirical work; problem statement.                                                                                                                                                                                                               | 3              |
| S4                        | Purpose or research questions               | Purpose of the study and specific objectives or questions                                                                                                                                                                                                                                                                                     | 3              |
| <b>Methods</b>            |                                             |                                                                                                                                                                                                                                                                                                                                               |                |
| S5                        | Qualitative approach and research paradigm  | Qualitative approach (e.g. ethnography, grounded theory, case study, phenomenology, narrative research) and guiding theory if appropriate; identifying the research paradigm (e.g. postpositivist, constructivist/interpretivist) is also recommended; rationale.                                                                             | 4              |
| S6                        | Researcher characteristics and reflectivity | Researchers' characteristics that may influence the research, including personal attributes, qualifications/experience, relationships with participants, assumption, and/or presuppositions; potential or actual interaction between researchers' characteristics and the research questions, approach, methods, results and/transferability. | 5              |
| S7                        | Context                                     | Setting/site and salient contextual factors; rationale.                                                                                                                                                                                                                                                                                       | 4-5            |



|                         |                                             |                                                                                                                                                                                                                                                                                        |      |
|-------------------------|---------------------------------------------|----------------------------------------------------------------------------------------------------------------------------------------------------------------------------------------------------------------------------------------------------------------------------------------|------|
| S8                      | Sampling strategy                           | How and why research participants, documents or events were selected; criteria for deciding when no further sampling was necessary (e.g. sampling saturation); rationale.                                                                                                              | 4    |
| S9                      | Ethical issues pertaining to human subjects | Documentation of approval by an appropriate ethics review board and participant consent, or explanation of lack thereof; other confidentiality and data security issues.                                                                                                               | 3, 5 |
| S10                     | Data collection methods                     | Types of data collected; details of data collection procedures including (as appropriate) start and stop dates of data collection and analysis; iterative process, triangulation of sources/methods, and modification of procedures in response to evolving study findings; rationale. | 5    |
| S11                     | Data collection instruments and techniques  | Description of instruments (e.g. interview guides, questionnaires) and devices (e.g. audio-recorders) used for data collection; if/how the instrument(s) changed over the course of the study.                                                                                         | 4-5  |
| S12                     | Units of study                              | Number and relevant characteristics of participants, documents, or events included in the study; level of participation (could be reported in results)                                                                                                                                 | 6-8  |
| S13                     | Data processing                             | Methods of processing data prior to and during analysis, including transcription, data entry, data management and security, verification of data integrity, data coding and anonymization/deidentification of excerpts.                                                                | 5-6  |
| S14                     | Data analysis                               | Process by which inferences, themes etc. were identified and developed, including researchers involved in the data analysis; usually references as specific paradigm or approach; rationale.                                                                                           | 5-6  |
| S15                     | Techniques to enhance trustworthiness       | Techniques to enhance trustworthiness and credibility of data analysis (e.g. member checking, audit trail, triangulation); rationale.                                                                                                                                                  | 5-6  |
| <b>Results/findings</b> |                                             |                                                                                                                                                                                                                                                                                        |      |
| S16                     | Synthesis and interpretation                | Main findings (e.g. interpretations, inferences, and themes); might include development of a theory or model, or integration with prior research or theory.                                                                                                                            | 9-16 |
| S17                     | Links to empirical data                     | Evidence (e.g. quotes, field notes, text excerpts, photographs) to substantiate analytic findings.                                                                                                                                                                                     | 9-16 |

1  
2  
3  
4  
5  
6  
7  
8  
9  
10  
11  
12  
13  
14  
15  
16  
17  
18  
19  
20  
21  
22  
23  
24  
25  
26  
27  
28  
29  
30  
31  
32  
33  
34  
35  
36  
37  
38  
39  
40  
41  
42  
43  
44  
45  
46

| <b>Discussion</b> |                                                                                              |                                                                                                                                                                                                                                                                                                        |       |
|-------------------|----------------------------------------------------------------------------------------------|--------------------------------------------------------------------------------------------------------------------------------------------------------------------------------------------------------------------------------------------------------------------------------------------------------|-------|
| S18               | Integration with prior work. Implications, transferability, and contribution(s) to the field | Short summary of main findings; explanation of how findings and conclusions connect to, support, elaborate on, or challenge conclusions of earlier scholarship; discussion of scope of application/generalizability; identification of unique contribution(s) to scholarship in a discipline or field. | 16-17 |
| S19               | Limitations                                                                                  | Trustworthiness and limitations of findings.                                                                                                                                                                                                                                                           | 16-17 |
| <b>Other</b>      |                                                                                              |                                                                                                                                                                                                                                                                                                        |       |
| S20               | Conflicts of interest                                                                        | Potential sources of influence or perceived influence on study conduct and conclusions; how these were managed.                                                                                                                                                                                        | 17    |
| S21               | Funding                                                                                      | Sources of funding and other support; role of funders in data collection, interpretation and reporting.                                                                                                                                                                                                | 17    |

From O'Brien, B., Harris, I. and Beckman, T. et al. Standards for Reporting Qualitative Research: A Synthesis of Recommendations. *Academic Medicine*. 2014; 89: 1245-1251

**Standards for Reporting Qualitative Research Checklist (SRQR)**

| Number                    | Topic                                       | Item                                                                                                                                                                                                                                                                                                                                          | Pages number/s |
|---------------------------|---------------------------------------------|-----------------------------------------------------------------------------------------------------------------------------------------------------------------------------------------------------------------------------------------------------------------------------------------------------------------------------------------------|----------------|
| <b>Title and Abstract</b> |                                             |                                                                                                                                                                                                                                                                                                                                               |                |
| S1                        | Title                                       | Concise description of the nature and topic of the study, identifying the study as qualitative or indicating the approach (e.g. ethnography, grounded theory) or data collection ,methods (e.g. interview, focus group) is recommended.                                                                                                       | 1              |
| S2                        | Abstract                                    | Summary of Key elements of the study using the abstract format of the intended publication; typically includes background, purpose, methods, results and conclusions.                                                                                                                                                                         | 1-2            |
| <b>Introduction</b>       |                                             |                                                                                                                                                                                                                                                                                                                                               |                |
| S3                        | Problem formulation                         | Description of significance of the problem/phenomenon studied; review of relevant theory and empirical work; problem statement.                                                                                                                                                                                                               | 3              |
| S4                        | Purpose or research questions               | Purpose of the study and specific objectives or questions                                                                                                                                                                                                                                                                                     | 3              |
| <b>Methods</b>            |                                             |                                                                                                                                                                                                                                                                                                                                               |                |
| S5                        | Qualitative approach and research paradigm  | Qualitative approach (e.g. ethnography, grounded theory, case study, phenomenology, narrative research) and guiding theory if appropriate; identifying the research paradigm (e.g. postpositivist, constructivist/interpretivist) is also recommended; rationale.                                                                             | 4              |
| S6                        | Researcher characteristics and reflectivity | Researchers' characteristics that may influence the research, including personal attributes, qualifications/experience, relationships with participants, assumption, and/or presuppositions; potential or actual interaction between researchers' characteristics and the research questions, approach, methods, results and/transferability. | 5              |
| S7                        | Context                                     | Setting/site and salient contextual factors; rationale.                                                                                                                                                                                                                                                                                       | 4-5            |

|                         |                                             |                                                                                                                                                                                                                                                                                        |      |
|-------------------------|---------------------------------------------|----------------------------------------------------------------------------------------------------------------------------------------------------------------------------------------------------------------------------------------------------------------------------------------|------|
| S8                      | Sampling strategy                           | How and why research participants, documents or events were selected; criteria for deciding when no further sampling was necessary (e.g. sampling saturation); rationale.                                                                                                              | 4    |
| S9                      | Ethical issues pertaining to human subjects | Documentation of approval by an appropriate ethics review board and participant consent, or explanation of lack thereof; other confidentiality and data security issues.                                                                                                               | 3, 5 |
| S10                     | Data collection methods                     | Types of data collected; details of data collection procedures including (as appropriate) start and stop dates of data collection and analysis; iterative process, triangulation of sources/methods, and modification of procedures in response to evolving study findings; rationale. | 5    |
| S11                     | Data collection instruments and techniques  | Description of instruments (e.g. interview guides, questionnaires) and devices (e.g. audio-recorders) used for data collection; if/how the instrument(s) changed over the course of the study.                                                                                         | 4-5  |
| S12                     | Units of study                              | Number and relevant characteristics of participants, documents, or events included in the study; level of participation (could be reported in results)                                                                                                                                 | 6-8  |
| S13                     | Data processing                             | Methods of processing data prior to and during analysis, including transcription, data entry, data management and security, verification of data integrity, data coding and anonymization/deidentification of excerpts.                                                                | 5-6  |
| S14                     | Data analysis                               | Process by which inferences, themes etc. were identified and developed, including researchers involved in the data analysis; usually references as specific paradigm or approach; rationale.                                                                                           | 5-6  |
| S15                     | Techniques to enhance trustworthiness       | Techniques to enhance trustworthiness and credibility of data analysis (e.g. member checking, audit trail, triangulation); rationale.                                                                                                                                                  | 5-6  |
| <b>Results/findings</b> |                                             |                                                                                                                                                                                                                                                                                        |      |
| S16                     | Synthesis and interpretation                | Main findings (e.g. interpretations, inferences, and themes); might include development of a theory or model, or integration with prior research or theory.                                                                                                                            | 9-16 |
| S17                     | Links to empirical data                     | Evidence (e.g. quotes, field notes, text excerpts, photographs) to substantiate analytic findings.                                                                                                                                                                                     | 9-16 |

| <b>Discussion</b> |                                                                                              |                                                                                                                                                                                                                                                                                                        |       |
|-------------------|----------------------------------------------------------------------------------------------|--------------------------------------------------------------------------------------------------------------------------------------------------------------------------------------------------------------------------------------------------------------------------------------------------------|-------|
| S18               | Integration with prior work. Implications, transferability, and contribution(s) to the field | Short summary of main findings; explanation of how findings and conclusions connect to, support, elaborate on, or challenge conclusions of earlier scholarship; discussion of scope of application/generalizability; identification of unique contribution(s) to scholarship in a discipline or field. | 16-17 |
| S19               | Limitations                                                                                  | Trustworthiness and limitations of findings.                                                                                                                                                                                                                                                           | 16-17 |
| <b>Other</b>      |                                                                                              |                                                                                                                                                                                                                                                                                                        |       |
| S20               | Conflicts of interest                                                                        | Potential sources of influence or perceived influence on study conduct and conclusions; how these were managed.                                                                                                                                                                                        | 17    |
| S21               | Funding                                                                                      | Sources of funding and other support; role of funders in data collection, interpretation and reporting.                                                                                                                                                                                                | 17    |

From O'Brien, B., Harris, I. and Beckman, T. et al. Standards for Reporting Qualitative Research: A Synthesis of Recommendations. *Academic Medicine*. 2014; 89: 1245-1251
